# Supplementary material
Source: publisher figshare collection journal article supplement (https://acs.figshare.com/ndownloader/files/4043137)

# Supporting Information

## **Palladium-Catalyzed Medium-Ring Formation for Construction of the Core Structure of *Laurencia* Oxacycles: Synthetic Study of Laurendecumallene B**

Yuji Yoshimitsu, Shinsuke Inuki, Shinya Oishi, Nobutaka Fujii,\* and Hiroaki Ohno\*

*Graduate School of Pharmaceutical Sciences, Kyoto University, Sakyo-ku, Kyoto 606-8501, Japan*

### **Table of Contents**

|                                                                |     |
|----------------------------------------------------------------|-----|
| Determination of the Relative Configuration of <b>28</b> ..... | S2  |
| Toward Total Synthesis of Laurendecumallene B .....            | S2  |
| Detailed Results of the Palladium-Catalyzed Cyclization .....  | S4  |
| Experimental Section .....                                     | S5  |
| NMR Spectra .....                                              | S17 |

## Determination of the Relative Configuration of **28**

It is well established that the relative configurations of the propargylic position and the neighboring 2-position of the related tetrahydrofuran-substituted propargyl alcohol derivatives can be unambiguously predicted based on their  $^1\text{H}$  NMR vicinal coupling constants; the *erythro* isomers generally show smaller vicinal coupling constants ( $J = 2\text{--}4$  Hz) than the corresponding *threo* isomers ( $J = 6\text{--}8$  Hz).<sup>1a</sup> In this case, the corresponding trisylate **29** was assigned as the *erythro* isomer on the basis of the small coupling constant between the  $\text{H}_3$  and  $\text{H}_4$  protons ( $J = 3.4$  Hz). The optical rotation value of the bromoallene **30** ( $[\alpha]_{\text{D}} = +68.4$ ) supports the observed Felkin–Anh-type diastereoselectivity in the formation of **28** ( $[\alpha]_{\text{D}} = -2.6$ ), which is in agreement with the results reported by Overman and Kim.<sup>1</sup>

## Toward Total Synthesis of Laurendecumallene **B** (Scheme S1)

It was important to note that the bromine atom should be introduced with both retention and inversion of the configuration at the C-13 position, because the stereochemistry at this position had not yet been elucidated. In other total syntheses of this class of haloethers, the introduction of the bromo substituent has typically been accomplished by direct  $\text{S}_{\text{N}}2$  displacement of the corresponding alcohol with  $\text{Oct}_3\text{P-CBr}_4$  in heated toluene, with inversion of the configuration.<sup>1b,2,3a</sup> Treatment of alcohol **30** with  $\text{Oct}_3\text{P-CBr}_4$  in heated toluene resulted in clean conversion to the corresponding bromide of the possible structure **31** (monitored by TLC). However, subsequent deprotection by  $\text{AcOH}$  at  $80\text{--}90^\circ\text{C}$  for 75 min led to decomposition of the bromination product without isolation of **2b**. Analysis of the crude reaction mixture did not indicate the presence of laurendecumallene **B** or its isomer. This suggested that the possible isomer **2b** and/or its precursor **31** are unstable under the deprotection conditions. We next investigated other bromination conditions, based on Murai's report.<sup>3a</sup> They reported that the bromination of related alcohols bearing the core structure of *Laurencia* oxacycles with  $\text{dppe-Br}_2$  in the presence of 2,6-lutidine and tetrabutylammonium bromide (TBAB) affords a considerable amount of the retention product via an oxonium ion intermediate, depending on the substrate structure.<sup>3</sup> We expected that application of the conditions using  $\text{dppe}$  to **30** would afford the corresponding bromide **31** as well as the retention product **33** (via the oxonium intermediate **32**). Exposure of **30** to the  $\text{dppe}$ -mediated bromination conditions, followed by cleavage of the acetonide with  $\text{AcOH}$  at  $80\text{--}90^\circ\text{C}$  for 4 h, gave isomer **2a** (or **2b**) in 12% yield with a substantial amount of unidentified products. The inversion product **2b** and **31** might also be produced here, but they would be decomposed during the deprotection step using  $\text{AcOH}$ . In spite of our efforts for purification of **2a** (or **2b**) by repeated column chromatography and preparative TLC, it could not be isolated in a pure form. The  $^1\text{H}$  NMR spectrum and optical rotation value ( $[\alpha]_{\text{D}} = +63.1$ ; lit<sup>4</sup>:  $[\alpha]_{\text{D}} = +60.6$ ) of **2a** (or **2b**) corresponded well with those of the natural product **2**. Unfortunately, we could not isolate the protected bromide **33** because of its instability.

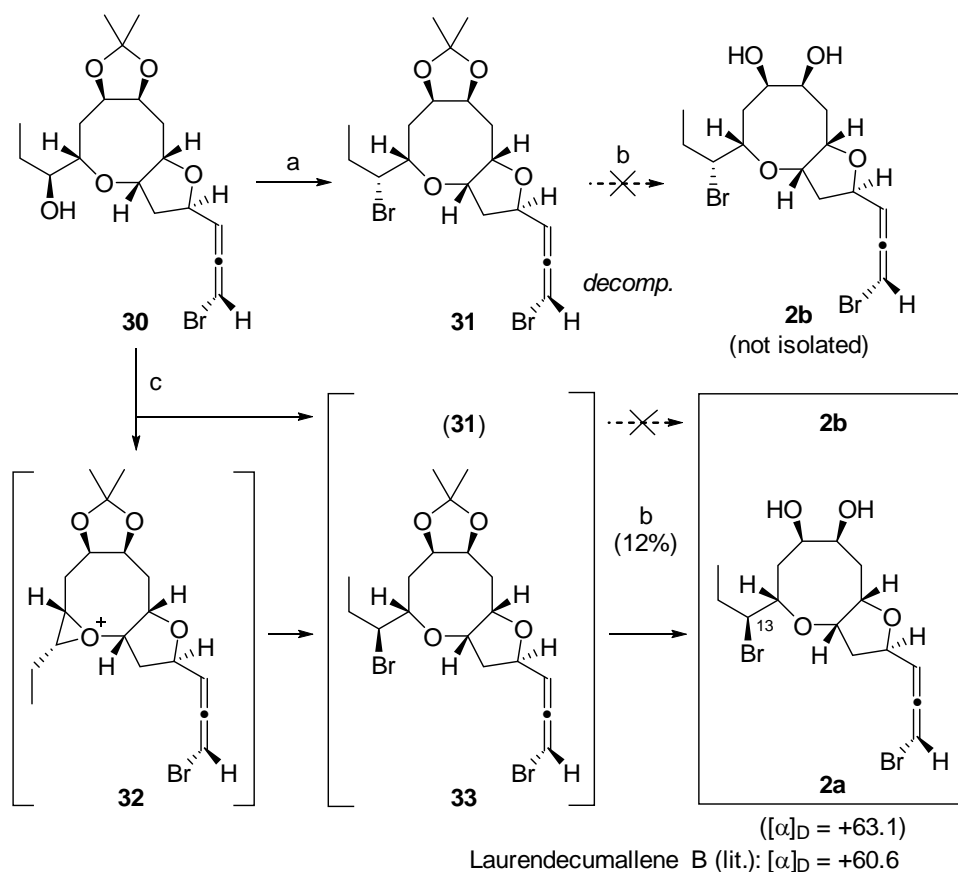

**Scheme S1.** Toward Total synthesis of laurendecumallene B.

*Reagents and conditions:* (a) Oct<sub>3</sub>P, CBr<sub>4</sub>, toluene, rt to 70 °C; (b) AcOH/H<sub>2</sub>O/THF (5:1:1), 80–90 °C; (c) dppe, Br<sub>2</sub>, 2,6-lutidine, TBAB, CH<sub>2</sub>Cl<sub>2</sub>, rt.

*Abbreviations:* dppe = 1,4-bis(diphenylphosphino)ethane. TBAB = tetrabutylammonium bromide.

- (1) (a) Grese, T. A.; Hutchinson, K. D.; Overman, L. E. *J. Org. Chem.* **1993**, *58*, 2468–2477. (b) Jeong, W.; Kim, M. J.; Kim, H.; Kim, S.; Kim, D.; Shin, K. *J. Angew. Chem., Int. Ed.* **2010**, *49*, 752–756.
- (2) (a) Sasaki, M.; Oyamada, K.; Takeda, K. *J. Org. Chem.* **2010**, *75*, 3941–3943. (b) Kim, M. J.; Sohn, T.; Kim, D.; Paton, R. S. *J. Am. Chem. Soc.* **2012**, *134*, 20178–20188. (c) Kim, H.; Lee, H.; Lee, D.; Kim, S.; Kim, D. *J. Am. Chem. Soc.* **2007**, *129*, 2269–2274. (d) Kim, B.; Lee, M.; Kim, M. J.; Lee, H.; Kim, S.; Kim, D.; Koh, M.; Park, S. B.; Bum, S. B.; Shin, K. *J. Am. Chem. Soc.* **2008**, *130*, 16807–16811.
- (3) (a) Fujiwara, K.; Kobayashi, M.; Awakura, D.; Murai, A. *Synlett* **2000**, 1187–1189. See also, (b) Bratz, M.; Bullock, W. H.; Overman, L. E.; Takemoto, T. *J. Am. Chem. Soc.* **1995**, *117*, 5958–5966. (c) Fujiwara, K.; Tsunashima, M.; Awakura, D.; Murai, A. *Tetrahedron Lett.* **1995**, *36*, 8263–8266.
- (4) Ji, N. Y.; Li, X. M.; Li, K.; Wang, B. G. *J. Nat. Prod.* **2007**, *70*, 1499–1502.

## Detailed Results of the Palladium-Catalyzed Cyclization

**Table S1.** Palladium-Catalyzed Cyclization of **14**.<sup>a</sup>

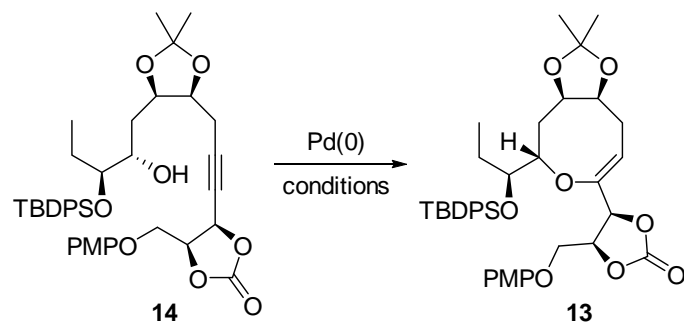

| entry          | solvent        | catalyst (mol %)                                 | ligand (mol %)        | H <sub>2</sub> O (equiv) | yield (%) <sup>b</sup> |
|----------------|----------------|--------------------------------------------------|-----------------------|--------------------------|------------------------|
| 1              | <b>MeOH</b>    | Pd <sub>2</sub> (dba) <sub>3</sub> (30)          | dppf (60)             | 0                        | 0                      |
| 2              | <b>DMF</b>     | Pd <sub>2</sub> (dba) <sub>3</sub> (30)          | dppf (60)             | 0                        | 14                     |
| 3              | DMF            | Pd <sub>2</sub> (dba) <sub>3</sub> (30)          | dppf (60)             | <b>3</b>                 | 40                     |
| 4 <sup>c</sup> | DMF            | Pd <sub>2</sub> (dba) <sub>3</sub> ( <b>20</b> ) | dppf (60)             | <b>10</b>                | 9                      |
| 5              | DMF            | Pd <sub>2</sub> (dba) <sub>3</sub> (30)          | dppf ( <b>80</b> )    | 2                        | 44                     |
| 6 <sup>d</sup> | DMF            | Pd <sub>2</sub> (dba) <sub>3</sub> (30)          | dppf (80)             | 2                        | <b>58</b>              |
| 7              | <b>DMSO</b>    | Pd <sub>2</sub> (dba) <sub>3</sub> (30)          | dppf (80)             | 2                        | 25                     |
| 8              | <b>DMA</b>     | Pd <sub>2</sub> (dba) <sub>3</sub> (30)          | dppf (80)             | 2                        | ND                     |
| 9              | <b>acetone</b> | Pd <sub>2</sub> (dba) <sub>3</sub> (30)          | dppf (80)             | 2                        | ND                     |
| 10             | <b>dioxane</b> | Pd <sub>2</sub> (dba) <sub>3</sub> (30)          | dppf (80)             | 2                        | ND                     |
| 11             | DMF            | Pd <sub>2</sub> (dba) <sub>3</sub> (30)          | <b>dppb</b> (80)      | 2                        | ND                     |
| 12             | DMF            | Pd <sub>2</sub> (dba) <sub>3</sub> (30)          | <b>xantphos</b> (0.8) | 2                        | ND                     |
| 13             | DMF            | <b>[Ir(cod)Cl]<sub>2</sub></b> (30)              | dppf (80)             | 2                        | ND                     |
| 14             | DMF            | <b>[Pd(allyl)Cl]<sub>2</sub></b> (30)            | dppf (80)             | 2                        | ND                     |

<sup>a</sup> Unless otherwise noted, the reactions were carried out at 50 °C in 10 mg scale.

<sup>b</sup> ND = not detected.

<sup>c</sup> The reaction was carried out at 70 °C.

<sup>d</sup> The reaction was carried out in a 100 mg scale.

The palladium-catalyzed cyclization of the carbonate **34** was also investigated. In all cases examined, only slow decomposition of the starting material was observed, without detecting the desired cyclization products **35a/35b**.

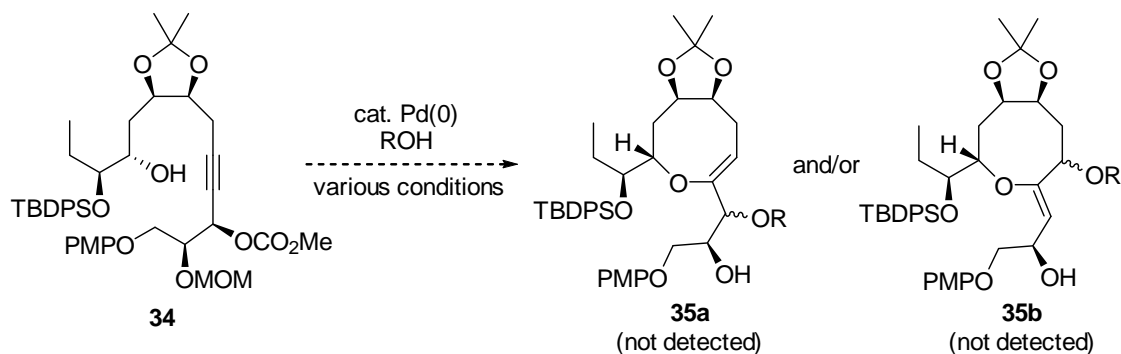

**Scheme S2.** Unsuccessful Palladium-Catalyzed Cyclization of Methyl Carbonate **34**.

## Experimental Section

**General Methods.** All moisture-sensitive reactions were performed using syringe-septum cap techniques under an argon atmosphere and all glassware was dried in an oven for 2 h at 80 °C prior to use. Reactions at –78 °C employed a CO<sub>2</sub>–MeOH bath. Melting points were measured by a hot stage melting point apparatus (uncorrected). <sup>1</sup>H NMR spectra were recorded at 500 or 400 MHz frequency, and chemical shifts are reported in  $\delta$  (ppm) relative to TMS (in CDCl<sub>3</sub>) as internal standard. <sup>13</sup>C NMR spectra were recorded at 125 or 100 MHz frequency and referenced to the residual CHCl<sub>3</sub> signal. <sup>1</sup>H NMR spectra are tabulated as follows: chemical shift, multiplicity (b = broad, s = singlet, d = doublet, t = triplet, q = quartet, br s = broad singlet, m = multiplet), number of protons, and coupling constant(s).

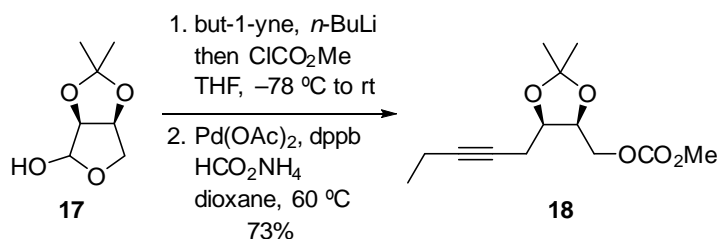

**[(4*S*,5*R*)-2,2-Dimethyl-5-(pent-2-yn-1-yl)-1,3-dioxolan-4-yl]methyl Methyl Carbonate (**18**).** To a stirred mixture of but-1-yne (2.6 g, 48.1 mmol) in THF (40 mL) was added *n*-BuLi in *n*-hexane (1.65 M; 29 mL, 47.9 mmol) at –78 °C, and the mixture was stirred for 30 min at this temperature. To the mixture of the resulting acetylide was added dropwise a solution of **17** (2.5 g, 15.6 mmol) in THF (13 mL) at –78 °C, and the mixture was allowed to warm to room temperature. After stirring for 7 h at this temperature, ClCO<sub>2</sub>Me was added dropwise at –78 °C and the mixture was allowed to warm to room temperature. The mixture was stirred for 20 min at this temperature and quenched by addition of saturated NH<sub>4</sub>Cl. The whole was extracted with Et<sub>2</sub>O, dried over MgSO<sub>4</sub>. Concentration under reduced pressure followed by rapid filtration through a short pad of silica gel gave crude carbonate, which was used without further purification. To a stirred solution of the above carbonate in dioxane (32 mL) were added Pd(OAc)<sub>2</sub> (360 mg, 1.60 mmol), dppb (1.4 g, 3.29 mmol) and ammonium formate (3.0 g, 47.6 mmol) at room temperature under Ar, and the mixture was stirred for 1.5 h at 60 °C. H<sub>2</sub>O was added to the mixture, and the whole was extracted Et<sub>2</sub>O. The extract was washed with H<sub>2</sub>O, and dried over MgSO<sub>4</sub>. The filtrate was concentrated under reduced pressure to give an oily residue, which was purified by flash chromatography over silica gel with *n*-hexane–EtOAc (10:1) to give **18** as a colorless oil (2.9 g, 73% yield): [ $\alpha$ ]<sub>D</sub><sup>25</sup> –59.8 (*c* 1.42, CHCl<sub>3</sub>); IR (neat): 2359 (C≡C), 1752 (C=O); <sup>1</sup>H NMR (500 MHz, CDCl<sub>3</sub>)  $\delta$  1.12 (t, *J* = 6.9 Hz, 3H), 1.36 (s, 3H), 1.47 (s, 3H), 2.15 (qdd, *J* = 6.9, 2.3, 2.3 Hz, 2H), 2.38–2.42 (m, 1H), 2.50–2.54 (m, 1H), 3.80 (s, 3H), 4.25 (dd, *J* = 11.0, 6.9 Hz, 1H), 4.32 (ddd, *J* = 8.0, 5.5, 5.5 Hz, 1H), 4.38 (ddd, *J* = 6.9, 5.5, 4.0 Hz 1H), 4.45 (dd, *J* = 11.0, 4.0 Hz, 1H); <sup>13</sup>C NMR (125 MHz, CDCl<sub>3</sub>)  $\delta$  12.3, 13.9, 20.3, 25.4, 27.8, 54.8, 66.3, 74.2, 75.1, 75.4, 84.2, 109.1, 155.6. *Anal.* Calcd for C<sub>13</sub>H<sub>20</sub>O<sub>5</sub>: C, 60.92; H, 7.87. Found: C, 61.19; H, 8.02.

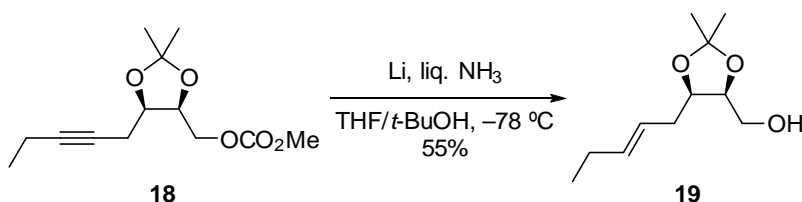

**{(4*S*,5*R*)-2,2-Dimethyl-5-[(*E*)-pent-2-en-1-yl]-1,3-dioxolan-4-yl}methanol (19).** Freshly cut pieces of lithium wire (380 mg, 54.2 mmol) were added in portions to liquid NH<sub>3</sub> (9 mL) at  $-78\text{ }^\circ\text{C}$ . After 10 min, a solution of **18** (695 mg, 2.71 mmol) in THF/*t*-BuOH (12 mL, 3:1) was added dropwise at  $-78\text{ }^\circ\text{C}$ , and the mixture was stirred at this temperature for 1 h. The reaction mixture was quenched by addition of solid NH<sub>4</sub>Cl (2.9 g, 54.7 mmol), and the cooling bath was removed. After NH<sub>3</sub> has evaporated, the residue was diluted with H<sub>2</sub>O and extracted with Et<sub>2</sub>O. The extract was dried over MgSO<sub>4</sub>, and the filtrate was concentrated under reduced pressure to give an oily residue, which was purified by flash chromatography over silica gel with *n*-hexane–EtOAc (10:1) to give **19** as a colorless oil (300 mg, 55% yield):  $[\alpha]_{\text{D}}^{25} -9.6$  (*c* 1.52, CHCl<sub>3</sub>); IR (neat): 3004 (C=C), 2962 (OH), 1752 (C=O); <sup>1</sup>H NMR (500 MHz, CDCl<sub>3</sub>)  $\delta$  0.98 (t, *J* = 7.4 Hz, 3H), 1.37 (s, 3H), 1.48 (s, 3H), 1.86–1.90 (m, 1H), 1.99–2.07 (m, 2H), 2.18–2.25 (m, 1H), 2.33–2.40 (m, 1H), 3.61–3.68 (m, 2H), 4.17–4.21 (m, 2H), 5.40 (dtd, *J* = 15.5, 8.0, 1.1 Hz, 1H), 5.59 (dt, *J* = 15.5, 6.3 Hz, 1H); <sup>13</sup>C NMR (125 MHz, CDCl<sub>3</sub>)  $\delta$  13.6, 25.5, 25.6, 28.2, 32.4, 61.7, 76.8, 77.8, 107.9, 123.7, 135.5. *Anal.* Calcd for C<sub>11</sub>H<sub>20</sub>O<sub>3</sub>: C, 65.97; H, 10.07. Found: C 65.69; H, 9.86.

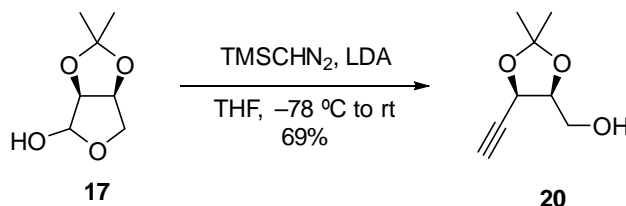

**[(4*S*,5*R*)-5-Ethynyl-2,2-dimethyl-1,3-dioxolan-4-yl]methanol (20).** By the procedure identical with that reported by Myers,<sup>5</sup> the known hemiacetal **17**<sup>6</sup> (14.5 g, 90.9 mmol) was converted into **20** (9.8 g, 69% yield). All spectral data were in agreement with those reported.

(5) Myers, A. G.; Goldberg, S. D. *Angew. Chem. Int. Ed.* **2000**, *39*, 2732–2735.

(6) Chapman, T. M.; Courtney, S.; Hay, P.; Davis, B. G. *Chem. Eur. J.* **2003**, *9*, 3397–3414.

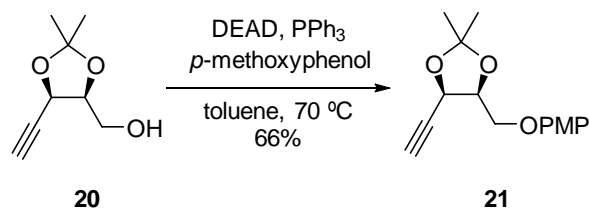

**(4*R*,5*S*)-4-Ethynyl-5-[(4-methoxyphenoxy)methyl]-2,2-dimethyl-1,3-dioxolane (21).**

To a stirred solution of **20** (87 mg, 0.557 mmol) in toluene (2.8 mL) were added PPh<sub>3</sub> (190 mg, 0.724 mmol), *p*-methoxyphenol (207 mg, 1.67 mmol) and DEAD in toluene (2.2 M; 329  $\mu\text{L}$ , 0.724

mmol) at 0 °C under argon, and the mixture was warmed to 70 °C. After stirring for 1 h at this temperature, the mixture was concentrated under reduced pressure, and diluted with Et<sub>2</sub>O to give white precipitate, which was removed by filtration. The filtrate was concentrated under reduced pressure to give an oily residue, which was purified by flash chromatography over silica gel with *n*-hexane–EtOAc (10:1) to give **21** as colorless crystals (97 mg, 66% yield): mp 80 °C; [ $\alpha$ ]<sup>25</sup><sub>D</sub> +16.3 (*c* 0.163, CHCl<sub>3</sub>); IR (neat): 2358 (C≡C); <sup>1</sup>H NMR (500 MHz, CDCl<sub>3</sub>)  $\delta$  1.41 (s, 3H), 1.58 (s, 3H), 2.52 (d, *J* = 2.3 Hz, 1H), 3.77 (s, 3H), 4.17–4.23 (m, 2H), 4.51 (dd, *J* = 12.0, 5.7 Hz, 1H), 4.94 (dd, *J* = 6.3, 2.3 Hz, 1H), 6.82–6.85 (m, 2H), 6.87–6.91 (m, 2H); <sup>13</sup>C NMR (125 MHz, CDCl<sub>3</sub>)  $\delta$  25.9, 27.7, 55.7, 67.6, 68.6, 75.8, 76.0, 77.1, 111.0, 114.6 (2C), 115.8 (2C), 152.7 (2C). *Anal.* Calcd for C<sub>15</sub>H<sub>18</sub>O<sub>4</sub>: C, 68.68; H, 6.92. Found: C, 68.40; H, 6.92.

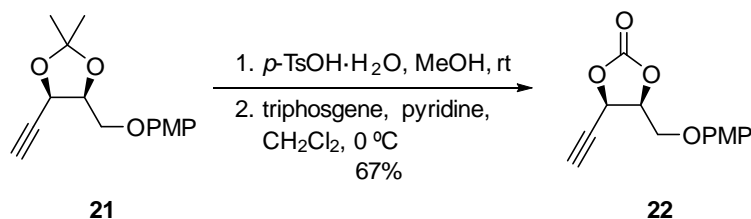

**(4*R*,5*S*)-4-Ethynyl-5-[(4-methoxyphenoxy)methyl]-1,3-dioxolan-2-one (22).** To a stirred solution of **21** (1.0 g, 3.81 mmol) in MeOH (38 mL) was added TsOH·H<sub>2</sub>O (363 mg, 1.91 mmol) at room temperature, and the mixture was stirred for 17 h at this temperature. The mixture was quenched by addition of Et<sub>3</sub>N (281  $\mu$ L, 3.81 mmol), and concentrated under reduced pressure to give an oily residue. Rapid filtration of the residue through a short pad of silica gel to give crude diol, which was used without further purification. To a stirred mixture of the above diol and pyridine (3.1 mL, 38.4 mmol) in CH<sub>2</sub>Cl<sub>2</sub> (30 mL) was added dropwise triphosgene (1.1 g, 3.70 mmol) in CH<sub>2</sub>Cl<sub>2</sub> (8 mL) at 0 °C, and stirred for 30 min at this temperature. The mixture was quenched by addition of 1N HCl at –78 °C, and the whole was extracted with CH<sub>2</sub>Cl<sub>2</sub>. The extract was dried over MgSO<sub>4</sub>, and the filtrate was concentrated under reduced pressure to give an oily residue. The residue was purified by flash chromatography over silica gel with CHCl<sub>3</sub> to give **22** as a white solid (636 mg, 67% yield). Recrystallization from *n*-hexane–EtOAc gave pure **22** as colorless crystals: mp 125 °C; [ $\alpha$ ]<sup>25</sup><sub>D</sub> –6.3 (*c* 0.22, CHCl<sub>3</sub>); IR (neat): 2362 (C≡C), 1752 (C=O); <sup>1</sup>H NMR (500 MHz, CDCl<sub>3</sub>)  $\delta$  2.75 (d, *J* = 2.3 Hz, 1H), 3.76 (s, 3H), 4.31–4.33 (m, 2H), 4.99–5.04 (m, 1H), 5.48 (dd, *J* = 8.0, 2.3 Hz, 1H), 6.81–6.91 (m, 4H); <sup>13</sup>C NMR (125 MHz, CDCl<sub>3</sub>)  $\delta$  55.7, 67.0, 68.1, 74.0, 75.6, 79.9, 114.7 (2C), 116.0 (2C), 151.8, 152.9, 154.8. *Anal.* Calcd for C<sub>13</sub>H<sub>12</sub>O<sub>5</sub>: C, 62.90; H, 4.87. Found: C, 62.73; H, 4.76.

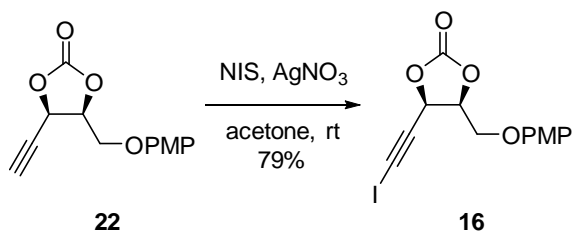

**(4*R*,5*S*)-4-(Iodoethynyl)-5-[(4-methoxyphenoxy)methyl]-1,3-dioxolan-2-one (16).** To the solution of **22** (630 mg, 2.54 mmol) in acetone (25 mL) were added NIS (686 mg, 3.05 mmol) and AgNO<sub>3</sub> (259 mg, 1.52 mmol) at room temperature, and the mixture was stirred at this temperature for 15 min. The mixture was diluted with Et<sub>2</sub>O (25 mL) and quenched with saturated Na<sub>2</sub>S<sub>2</sub>O<sub>3</sub>. Aqueous layer was separated and extracted with EtOAc, and the combined organic layer was concentrated under reduced pressure to give an oily residue. The residue was purified by flash chromatography over silica gel with CHCl<sub>3</sub> to give **16** as a white solid (746 mg, 79% yield), which was recrystallized from *n*-hexane–EtOAc to give colorless crystals: mp 125 °C; [ $\alpha$ ]<sub>D</sub><sup>25</sup> +16.2 (*c* 0.59, CHCl<sub>3</sub>); IR (neat): 2359 (C≡C), 1811 (C=O); <sup>1</sup>H NMR (500 MHz, CDCl<sub>3</sub>)  $\delta$  3.78 (s, 3H), 4.27–4.33 (m, 2H), 4.98 (dt, *J* = 7.4, 5.2 Hz, 1H), 5.59 (d, *J* = 7.4 Hz, 1H), 6.83–6.89 (m, 4H); <sup>13</sup>C NMR (125 MHz, CDCl<sub>3</sub>)  $\delta$  11.9, 55.8, 67.1, 69.5, 76.0, 84.5, 114.7 (2C), 116.4 (2C), 151.9, 152.8, 154.6. *Anal.* Calcd for C<sub>13</sub>H<sub>11</sub>IO<sub>5</sub>: C, 41.73; H, 2.96. Found: C, 41.79; H, 2.94.

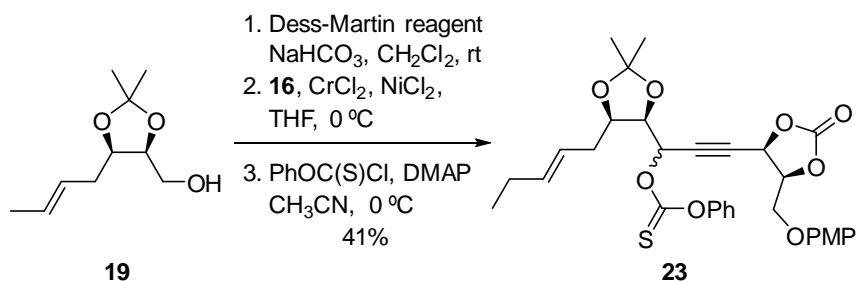

***O*-(1-((4*R*,5*R*)-2,2-Dimethyl-5-[(*E*)-pent-2-en-1-yl]-1,3-dioxolan-4-yl)-3-((4*R*,5*S*)-5-[(4-methoxyphenoxy)methyl]-2-oxo-1,3-dioxolan-4-yl)prop-2-yn-1-yl) *O*-Phenyl Carbothioate (23).** To a stirred solution of **19** (5.7 g, 28.3 mmol) in CH<sub>2</sub>Cl<sub>2</sub> (280 mL) were added NaHCO<sub>3</sub> (7.1 g, 84.5 mmol) and Dess-Martin periodinane (18.0 g, 42.5 mmol) at room temperature, and the mixture was stirred for 15 min at this temperature, followed by quenching with saturated Na<sub>2</sub>S<sub>2</sub>O<sub>3</sub> at 0 °C. The whole was extracted with CH<sub>2</sub>Cl<sub>2</sub> and the extract was dried over MgSO<sub>4</sub>. The filtrate was concentrated under reduced pressure to give crude aldehyde as yellow oil, which was used without further purification. To a stirred solution of above aldehyde in THF (140 mL) were added **16**, CrCl<sub>2</sub> (13.9 g, 113 mmol) and NiCl<sub>2</sub> (184 mg, 1.42 mmol) at 0 °C under Ar, and the mixture was stirred for 1 h at this temperature and further 10 min at room temperature, followed by quenching with saturated NH<sub>4</sub>Cl. The whole was extracted with Et<sub>2</sub>O. The extract was dried over MgSO<sub>4</sub>, and concentrated under reduced pressure to give an oily residue, which was purified by column chromatography over silica gel with *n*-hexane–EtOAc (2:1) to give crude propargyl alcohol. To the stirred mixture of above propargyl alcohol and DMAP (5.2 g, 42.6 mmol) in CH<sub>3</sub>CN (35 mL) was added dropwise PhOC(S)Cl (5.9 mL, 42.6 mmol) in CH<sub>3</sub>CN (35 mL) at 0 °C, and the mixture was stirred at this temperature for 10 min, followed by quenching with MeOH (3.5 mL, 86.4 mmol). Saturated NH<sub>4</sub>Cl was added to the mixture and the whole was extracted with Et<sub>2</sub>O. The extract was dried over MgSO<sub>4</sub>, and concentrated under reduced pressure to give an oily residue, which was purified by flash chromatography over silica gel with *n*-hexane–EtOAc (4:1) to give **23** as a pale yellow amorphous (6.8 g, 41% yield): [ $\alpha$ ]<sub>D</sub><sup>25</sup> +3.4 (*c* 0.77, CHCl<sub>3</sub>); IR (neat): 2963 (OH), 2362 (C≡C), 1814 (C=O), 1233 (C=S); <sup>1</sup>H NMR (500 MHz, CDCl<sub>3</sub>)  $\delta$  0.97 (t, *J* = 7.4 Hz, 3H), 1.36 (s,



3H), 1.49 (s, 3H), 1.98–2.09 (m, 2H), 2.30–2.43 (m, 2H), 3.74 (s, 3H), 4.25–4.36 (m, 4H), 5.01–5.06 (m, 1H), 5.38–5.46 (m, 1H), 5.55–5.63 (m, 2H), 5.84 (dd,  $J = 5.7, 1.7$  Hz, 1H), 6.78–6.90 (m, 4H), 7.04 (d,  $J = 8.6$  Hz, 2H), 7.31 (dd,  $J = 7.4, 7.4$  Hz, 1H), 7.41 (dd,  $J = 7.4, 7.4$  Hz, 2H);  $^{13}\text{C}$  NMR (125 MHz,  $\text{CDCl}_3$ )  $\delta$  13.6, 25.1, 25.6, 27.4, 32.1, 55.7, 67.2, 68.1, 69.4, 72.3, 76.0, 76.1, 78.5, 85.9, 109.2, 114.7 (2C), 115.9 (2C), 121.7 (2C), 123.6, 126.9, 129.7 (2C), 135.7, 151.9, 152.9, 153.5, 154.7, 193.5; HRMS (FAB) calcd for  $\text{C}_{31}\text{H}_{34}\text{NaO}_9\text{S}$   $[\text{M}+\text{Na}]^+$ , 605.1821; found: 605.1825.

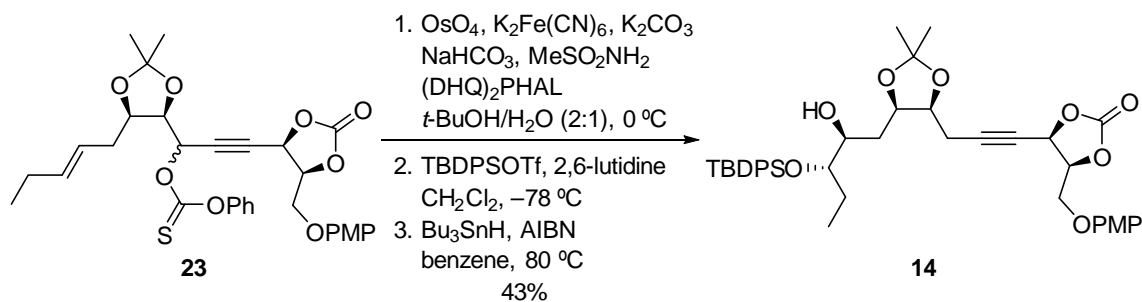

**(4*R*,5*S*)-4-[3-((4*S*,5*R*)-5-((2*S*,3*S*)-3-[(*tert*-Butyldiphenylsilyl)oxy]-2-hydroxypentyl)-2,2-dimethyl-1,3-dioxolan-4-yl)prop-1-yn-1-yl]-5-[(4-methoxyphenoxy)methyl]-1,3-dioxolan-2-one (14).**

To a stirred solution of **23** (6.1 g, 10.5 mmol) in  $t\text{-BuOH}/\text{H}_2\text{O}$  (525 mL, 2:1) were added  $\text{OsO}_4$  in  $t\text{-BuOH}$  (2.5 w/v%, 2.1 mL, 0.207 mmol),  $(\text{DHQ})_2\text{PHAL}$  (490 mg, 0.629 mmol),  $\text{K}_2\text{CO}_3$  (4.3 g, 31.2 mmol),  $\text{K}_2\text{Fe}(\text{CN})_6$  (10.3 g, 31.3 mmol),  $\text{MeSO}_2\text{NH}_2$  (3.0 g, 31.6 mmol) and  $\text{NaHCO}_3$  (2.6 g, 31.0 mmol) at  $0\text{ }^\circ\text{C}$ . The mixture was stirred at this temperature for 1.5 h, and the mixture was quenched by saturated  $\text{Na}_2\text{S}_2\text{O}_3$ . The whole was extracted with  $\text{EtOAc}$ , and dried over  $\text{MgSO}_4$ . The filtrate was concentrated to give an oily residue, which was followed by rapid filtration through a short pad of silica gel to give unstable crude diol. This crude material was used without further purification. To the stirred mixture of the above diol in  $\text{CH}_2\text{Cl}_2$  (30 mL) were added 2,6-lutidine (2.3 mL, 20.0 mmol) and  $\text{TBDPSOTf}$  (6.2 g, 16.0 mmol) in  $\text{CH}_2\text{Cl}_2$  (10 mL) at  $-78\text{ }^\circ\text{C}$ , and the mixture was stirred for 3 h at this temperature. The mixture was quenched by addition of  $\text{MeOH}$  (648  $\mu\text{L}$ , 16 mmol) and 1N  $\text{HCl}$ . The whole was extracted with  $\text{CH}_2\text{Cl}_2$ , and dried over  $\text{MgSO}_4$ . The filtrate was concentrated under reduced pressure to give an oily residue, which was followed by rapid filtration through a short pad of silica gel to give unstable silyl ether, which was used without further purification. To the stirred mixture of the above silyl ether in degassed benzene (29 mL),  $\text{Bu}_3\text{SnH}$  (4.7 mL, 17.4 mmol) and AIBN (48 mg, 0.293 mmol) were added at room temperature and warmed to  $80\text{ }^\circ\text{C}$ . After stirring for 40 min at this temperature, concentration under reduced pressure gave an oily residue, which was purified by flash chromatography over silica gel with  $n\text{-hexane}-\text{EtOAc}$  (4:1) to give **14** as a pale yellow amorphous (3.2 g, 43% yield):  $[\alpha]_D^{25} -24.6$  ( $c$  0.35,  $\text{CHCl}_3$ ); IR (neat): 2335 ( $\text{C}\equiv\text{C}$ ), 1805 ( $\text{C}=\text{O}$ );  $^1\text{H}$  NMR (500 MHz,  $\text{CDCl}_3$ )  $\delta$  0.78 (t,  $J = 7.4$  Hz, 3H), 1.07 (s, 9H), 1.21 (s, 3H), 1.23–1.29 (m, 1H), 1.36 (s, 3H), 1.38–1.46 (m, 1H), 1.54–1.75 (m, 3H), 2.16–2.22 (m, 1H), 2.30 (ddd,  $J = 16.6, 7.4, 1.7$  Hz, 1H), 2.78 (d,  $J = 4.6$  Hz, 1H), 3.63–3.71 (m, 2H), 3.76 (s, 3H), 3.85–3.96 (m, 2H), 4.23–4.31 (m, 2H), 4.91–4.96 (m, 1H), 5.38 (ddd,  $J = 7.4, 3.4, 1.7$  Hz, 1H), 6.79–6.85 (m, 2H), 6.85–6.90 (m, 2H), 7.35–7.46 (m, 6H), 7.65–7.69 (m, 4H);  $^{13}\text{C}$  NMR (125 MHz,  $\text{CDCl}_3$ )  $\delta$  10.0, 19.5, 21.2, 25.3, 25.5, 27.1 (3C), 28.1,

31.4, 55.6, 67.2, 68.6, 71.6, 75.7, 76.1, 76.3, 76.5, 77.2, 89.4, 108.6, 114.6 (2C), 115.9 (2C), 127.6 (4C), 129.9 (2C), 134.0 (2C), 135.9 (4C), 152.1, 153.3, 154.5; HRMS (ESI) calcd for  $C_{40}H_{50}NaO_9Si$   $[M+Na]^+$ , 725.3122; found: 725.3131.

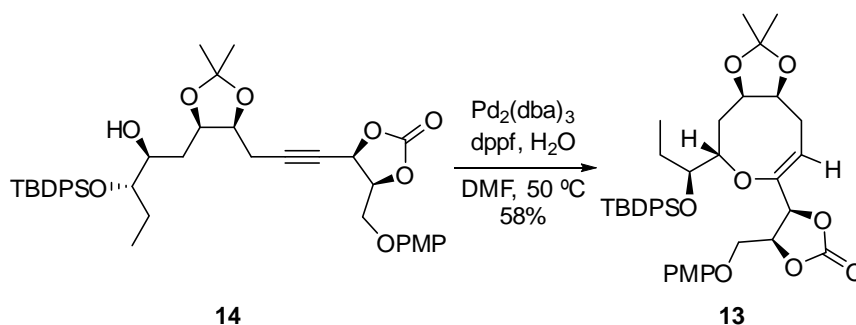

**(4*S*,5*S*)-4-((3*aR*,5*S*,9*aS*,*Z*)-5-((*S*)-1-[(*tert*-Butyldiphenylsilyl)oxy]propyl)-2,2-dimethyl-4,5,9,9a-tetrahydro-3*aH*-[1,3]dioxolo[4,5-*d*]oxocin-7-yl)-5-[(4-methoxyphenoxy)methyl]-1,3-dioxolan-2-one (13).** To a stirred mixture of **14** (103 mg, 0.147 mmol) in DMF (29 mL) were added H<sub>2</sub>O (8  $\mu$ L, 0.444 mmol), Pd<sub>2</sub>(dba)<sub>3</sub> (40 mg, 0.0437 mmol) and dppf (65 mg, 0.117 mmol) at room temperature under Ar. The mixture was stirred for 5 min at room temperature and further 30 min at 50 °C, followed by addition of H<sub>2</sub>O. The whole was extracted with Et<sub>2</sub>O, dried over MgSO<sub>4</sub>. The extract was concentrated under reduced pressure to give an oily residue, which was purified by flash chromatography over silica gel with *n*-hexane–EtOAc (4:1) to give **13** as a pale yellow amorphous (61 mg, 58% yield):  $[\alpha]^{25}_D$  –35.1 (*c* 0.12, CHCl<sub>3</sub>); IR (neat): 2931 (C=C), 1814 (C=O); <sup>1</sup>H NMR (500 MHz, CDCl<sub>3</sub>)  $\delta$  0.78 (t, *J* = 7.4 Hz, 3H), 1.07 (s, 9H), 1.19 (s, 3H), 1.37 (s, 3H), 1.45–1.53 (m, 1H), 1.56–1.66 (m, 1H), 1.98 (ddd, *J* = 15.5, 12.0, 6.3 Hz, 1H), 2.05 (ddd, *J* = 15.5, 8.6, 3.4 Hz, 1H), 2.16–2.27 (m, 2H), 3.74 (s, 3H), 3.79–3.84 (m, 1H), 3.84–3.89 (m, 1H), 4.05 (dd, *J* = 9.7, 5.2 Hz, 1H), 4.08–4.13 (m, 1H), 4.19 (dd, *J* = 9.7, 5.7 Hz, 1H), 4.21–4.26 (m, 1H), 4.91–4.99 (m, 3H), 6.71–6.76 (m, 2H), 6.77–6.82 (m, 2H), 7.34–7.45 (m, 6H), 7.65–7.70 (m, 4H); <sup>13</sup>C NMR (125 MHz, CDCl<sub>3</sub>)  $\delta$  10.8, 19.8, 25.1, 25.9, 27.2, 27.4 (3C), 28.6, 29.8, 55.9, 66.8, 75.2, 76.7 (2C), 76.8, 79.3, 79.6, 107.5, 109.3, 115.0 (2C), 115.6 (2C), 128.0 (4C), 130.0 (2C), 134.1, 134.3, 136.2 (4C), 150.0, 152.0, 153.8, 154.8; HRMS (ESI) calcd for  $C_{40}H_{50}NaO_9Si$   $[M+Na]^+$ , 725.3122; found: 725.3127.

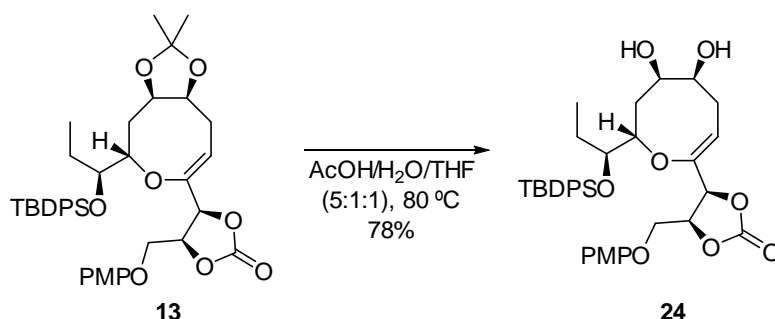

**(4*S*,5*S*)-4-((2*S*,4*R*,5*S*,*Z*)-2-((*S*)-1-[(*tert*-Butyldiphenylsilyl)oxy]propyl)-4,5-dihydroxy-3,4,5,6-tetrahydro-2*H*-oxocin-8-yl)-5-[(4-methoxyphenoxy)methyl]-1,3-dioxolan-2-one (24).** A mixed solvent of AcOH/THF/H<sub>2</sub>O (24 mL, 5:1:1) was added to a flask containing **13** (840 mg, 1.19 mmol), and the mixture was stirred at 80 °C for 4 h. The mixture was concentrated under reduced pressure

to give an oily residue, which was purified by flash chromatography over silica gel with *n*-hexane–EtOAc (1:1) to give **24** as a colorless oil (611 mg, 78% yield):  $[\alpha]_D^{25}$  –26.1 (*c* 0.93, CHCl<sub>3</sub>); IR (neat): 3014 (C=C), 2861 (OH), 1808 (C=O); <sup>1</sup>H NMR (400 MHz, CDCl<sub>3</sub>)  $\delta$  0.73 (t, *J* = 7.8 Hz, 3H), 1.07 (s, 9H), 1.41–1.54 (m, 1H), 1.57–1.72 (m, 1H), 1.95–2.06 (m, 3H), 2.47 (ddd, *J* = 16.4, 10.0, 5.0 Hz, 1H), 3.64 (ddd, *J* = 6.4, 6.4, 3.2 Hz, 1H), 3.70–3.76 (m, 1H), 3.74 (s, 3H), 3.84–3.90 (m, 1H), 4.15–4.20 (m, 1H), 4.21–4.26 (m, 1H), 4.34–4.40 (m, 1H), 4.87 (dd, *J* = 9.6, 5.0 Hz, 1H), 4.94–5.02 (m, 2H), 6.74–6.84 (m, 4H), 7.33–7.45 (m, 6H), 7.64–7.72 (m, 4H); <sup>13</sup>C NMR (100 MHz, CDCl<sub>3</sub>)  $\delta$  10.2, 19.4, 25.3, 27.0 (3C), 28.1, 32.8, 55.6, 66.4, 69.6, 72.4, 76.2, 76.6, 76.7, 79.1, 105.1, 114.8 (2C), 115.5 (2C), 127.6 (4C), 129.6 (2C), 133.7 (2C), 135.8 (4C), 148.0, 151.8, 153.7, 154.3; HRMS (ESI) calcd for C<sub>37</sub>H<sub>46</sub>NaO<sub>9</sub>Si [M+Na]<sup>+</sup>, 685.2809; found: 685.2809.

**(4*S*,5*S*)-4-((2*R*,3*R*,5*S*,6*R*,8*S*)-8-((*S*)-1-[(*tert*-Butyldiphenylsilyl)oxy]propyl)-3,5,6-trihydroxy-oxocan-2-yl)-5-[(4-methoxyphenoxy)methyl]-1,3-dioxolan-2-one (25).** To a stirred solution of **24** (150 mg, 0.227 mmol) in THF (2.2 mL) was added dropwise BH<sub>3</sub>·SMe<sub>2</sub> in THF (2.0 M, 550 μL, 2.2 mmol) at 0 °C and the mixture was allowed to warm to room temperature. After stirring for 2 h at this temperature, H<sub>2</sub>O (2.2 mL) and NaBO<sub>3</sub> (347 mg, 2.27 mmol) were added to the mixture at 0 °C, and the mixture was allowed to warm to room temperature. The mixture was stirred at this temperature for 1 h, followed by quenching with saturated NH<sub>4</sub>Cl. The whole was extracted with EtOAc. The extract was washed with H<sub>2</sub>O and dried over MgSO<sub>4</sub>. The filtrate was concentrated under reduced pressure to give an oily residue, which was purified by flash chromatography over silica gel with *n*-hexane–EtOAc (1:2) to give **25** as a colorless oil (80 mg, 49% yield): [α]<sub>D</sub><sup>25</sup> –29.1 (*c* 1.70, CHCl<sub>3</sub>); IR (neat): 2938 (OH), 1805 (C=O); <sup>1</sup>H NMR (500 MHz, CDCl<sub>3</sub>) δ 0.91 (t, *J* = 6.9 Hz, 3H), 1.06 (s, 9H), 1.36–1.46 (m, 1H), 1.46–1.54 (m, 1H), 1.67–1.73 (m, 2H), 1.90 (br s, 1H), 1.99 (ddd, *J* = 14.9, 6.3, 2.3 Hz, 1H), 2.07–2.16 (m, 1H), 2.25 (br s, 1H), 3.21 (br s, 1H), 3.56–3.63 (m, 1H), 3.71–3.78 (m, 2H), 3.76 (s, 3H), 3.78–3.86 (m, 2H), 3.94–4.01 (m, 1H), 4.10 (dd, *J* = 10.3, 5.2 Hz, 1H), 4.20 (dd, *J* = 10.3, 5.2 Hz, 1H), 4.69 (dd, *J* = 8.0, 4.0 Hz, 1H), 4.80–4.86 (m, 1H), 6.68–6.75 (m, 2H), 6.77–6.81 (m, 2H), 7.33–7.46 (m, 6H), 7.63–7.72 (m, 4H); <sup>13</sup>C NMR (125 MHz, CD<sub>3</sub>Cl) δ 10.8, 19.6, 24.1, 27.1 (3C), 32.9, 37.0, 55.7, 66.2, 70.2, 72.0, 72.1, 75.3, 77.1, 77.9, 78.5, 82.0, 114.8 (2C), 115.6 (2C), 127.7 (4C), 129.8 (2C), 133.8, 134.2, 136.1 (4C), 151.6, 153.7, 154.5; HRMS (FAB) calcd for C<sub>37</sub>H<sub>49</sub>O<sub>10</sub>Si [M+H]<sup>+</sup>, 681.3090; found: 681.3098.

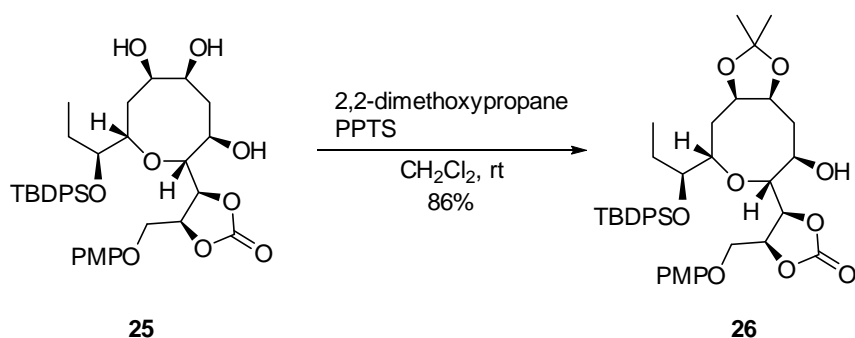

**(4*S*,5*S*)-4-((3*aR*,5*S*,7*R*,8*R*,9*aS*)-5-((*S*)-1-[(*tert*-Butyldiphenylsilyl)oxy]propyl)-8-hydroxy-2,2-dimethylhexahydro-3*aH*-[1,3]dioxolo[4,5-*d*]oxocin-7-yl)-5-[(4-methoxyphenoxy)methyl]-1,3-dioxolan-2-one (26).** To a stirred solution of **25** (159 mg, 0.233 mmol) in CH<sub>2</sub>Cl<sub>2</sub> (2.3 mL) were added 2,2-dimethoxypropane (143 μL, 1.17 mmol) and PPTS (18 mg, 0.0717 mmol) at room temperature, and the mixture was stirred at room temperature for 11 h. The mixture was quenched by addition of diisopropylethylamine (24 μL, 0.138 mmol) and concentrated under reduced pressure to give an oily residue, which was purified by flash chromatography over silica gel with *n*-hexane–EtOAc (3:1) to give **26** as a colorless oil (144 mg, 86% yield): [ $\alpha$ ]<sub>D</sub><sup>25</sup> –21.7 (*c* 1.43, CHCl<sub>3</sub>); IR (neat): 2933 (OH), 1806 (C=O); <sup>1</sup>H NMR (400 MHz, CDCl<sub>3</sub>)  $\delta$  0.75 (t, *J* = 6.9 Hz, 3H), 1.07 (s, 9H), 1.26 (s, 3H), 1.41 (s, 3H), 1.42–1.48 (m, 1H), 1.50–1.58 (m, 1H), 1.88–1.99 (m, 3H), 2.05–2.16 (m, 1H), 3.63–3.75 (m, 7H), 4.14–4.24 (m, 2H), 4.23–4.33 (m, 2H), 4.87–4.95 (m, 2H), 6.73–6.80 (m, 4H), 7.34–7.45 (m, 6H), 7.67–7.74 (m, 4H); <sup>13</sup>C NMR (100 MHz, CD<sub>3</sub>Cl)  $\delta$  9.9, 19.5, 24.3 (2C), 25.7, 27.1 (3C), 27.4, 29.2, 55.7, 66.6, 68.8, 73.7, 75.4, 76.1, 77.2, 79.4, 79.7, 80.5, 106.5, 114.8 (2C), 115.4 (2C), 127.6 (4C), 129.7 (2C), 133.7, 133.8, 136.0 (4C), 151.7, 153.8, 154.5; HRMS (FAB) calcd for C<sub>40</sub>H<sub>53</sub>O<sub>10</sub>Si [M+H]<sup>+</sup>, 721.3403; found: 721.3406.

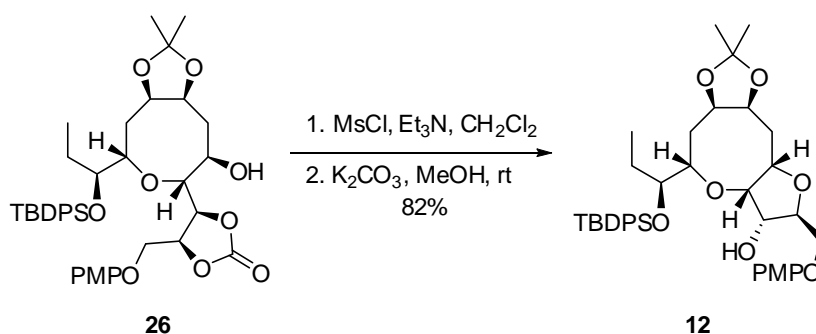

**(3*aR*,5*S*,6*aS*,7*S*,8*S*,9*aS*,10*aS*)-5-((*S*)-1-[(*tert*-Butyldiphenylsilyl)oxy]propyl)-8-[(4-methoxyphenoxy)methyl]-2,2-dimethyloctahydro-3*aH*-[1,3]dioxolo[4,5-*e*]furo[3,2-*b*]oxocin-7-ol (12).** To a stirred solution of **26** (140 mg, 0.194 mmol) in CH<sub>2</sub>Cl<sub>2</sub> (4 mL) were added Et<sub>3</sub>N (81 μL, 0.584 mmol) and MsCl (30 μL, 0.386 mmol) at room temperature. After stirring for 10 min at this temperature, the mixture was quenched by addition of saturated NH<sub>4</sub>Cl. The whole was extracted with CH<sub>2</sub>Cl<sub>2</sub>, and the extract was dried over MgSO<sub>4</sub>. The filtrate was concentrated under reduced pressure to give crude mesylate, which was used without further purification. To a stirred mixture of above mesylate in MeOH (4.0 mL) was added K<sub>2</sub>CO<sub>3</sub> (82 mg, 0.594 mmol) at room temperature. After stirring for 30 min at this temperature, the mixture was quenched by addition of saturated

NH<sub>4</sub>Cl. The whole was extracted with CH<sub>2</sub>Cl<sub>2</sub>, and the extract was dried over MgSO<sub>4</sub>. The filtrate was concentrated under reduced pressure to give an oily residue, which was purified by flash chromatography over silica gel with *n*-hexane–EtOAc (3:1) to give **12** as a colorless oil (108 mg, 82% yield): [ $\alpha$ ]<sub>D</sub><sup>25</sup> –29.8 (*c* 1.03, CHCl<sub>3</sub>); IR (neat), 2934 (OH); <sup>1</sup>H NMR (500 MHz, CDCl<sub>3</sub>)  $\delta$  0.77 (t, *J* = 7.4 Hz, 3H), 1.09 (s, 9H), 1.28 (s, 3H), 1.32–1.39 (m, 2H) 1.38 (s, 3H), 1.99–2.14 (m, 4H), 2.91 (d, *J* = 9.7 Hz, 1H), 3.64–3.71 (m, 2H), 3.75 (s, 3H), 3.83–3.87 (m, 1H), 3.95 (dd, *J* = 10.3, 4.6 Hz, 1H), 4.04–4.10 (m, 1H), 4.12 (dd, *J* = 10.3, 2.3 Hz, 1H), 4.17–4.20 (m, 1H), 4.20–4.26 (m, 1H), 4.26–4.32 (m, 1H), 4.61–4.68 (m, 1H) 6.77–6.83 (m, 2H), 6.84–6.89 (m, 2H), 7.35–7.46 (m, 6H), 7.70 (d, *J* = 7.4 Hz, 2H), 7.76 (d, *J* = 7.4 Hz, 2H); <sup>13</sup>C NMR (125 MHz, CDCl<sub>3</sub>)  $\delta$  7.9, 19.3, 25.3, 25.6, 27.2 (3C), 28.1, 29.2, 32.5, 55.6, 69.1, 73.3 (2C), 73.9, 74.7, 77.1, 80.1, 80.5, 82.1, 106.2, 114.5 (2C), 115.8 (2C), 127.7 (4C), 129.8 (2C), 133.7, 134.3, 135.6 (2C), 135.9 (2C), 153.1, 153.9; HRMS (FAB) calcd for C<sub>39</sub>H<sub>53</sub>O<sub>8</sub>Si [M+H]<sup>+</sup>, 677.3504; found: 677.3510.

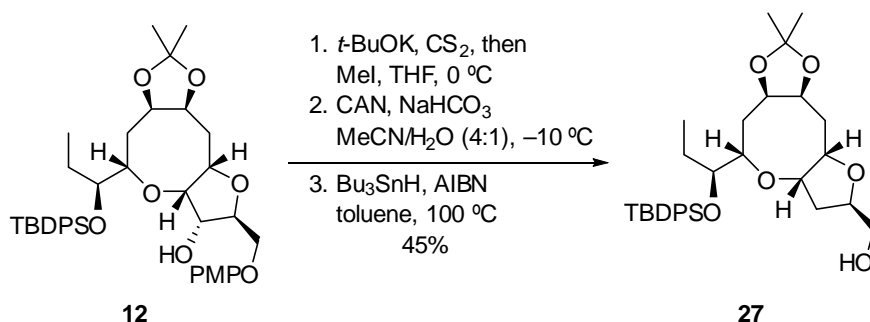

(3*aR*,5*S*,6*aS*,8*R*,9*aS*,10*aS*)-5-[(*S*)-1-[(*tert*-Butyldiphenylsilyl)oxy]propyl-2,2-dimethyloctahydro-3*aH*-[1,3]dioxolo[4,5-*e*]furo[3,2-*b*]oxocin-8-yl)methanol (**27**). To a stirred solution of **12** (35.0 mg, 0.0518 mmol) in THF (1.7 mL) were added CS<sub>2</sub> (15.6  $\mu$ L, 0.259 mmol) and *t*-BuOK (29.0 mg, 0.259 mmol) at –78 °C. After stirring for 10 min at room temperature, MeI (16.1  $\mu$ L, 0.256 mmol) was added to the solution. After stirring for 10 min at this temperature, the mixture was quenched by addition of saturated NH<sub>4</sub>Cl. The whole was extracted with Et<sub>2</sub>O, and the extract was dried over MgSO<sub>4</sub>. The filtrate was concentrated under reduced pressure to give crude xanthate, which was used without further purification. To a stirred solution of the above crude xanthate in CH<sub>3</sub>CN/H<sub>2</sub>O (2.1 mL, 4:1) were added NaHCO<sub>3</sub> (11.0 mg, 0.131 mmol) and CAN (34.0 mg, 0.0620 mmol) at –10 °C. After stirring for 15 min at this temperature, the mixture was quenched by addition of saturated Na<sub>2</sub>S<sub>2</sub>O<sub>3</sub>. The whole was extracted with EtOAc, and the extract was dried over MgSO<sub>4</sub>. The filtrate was concentrated under reduced pressure to give crude alcohol, which was used without further purification. To the stirred mixture of above alcohol in toluene (300  $\mu$ L), Bu<sub>3</sub>SnH (69  $\mu$ L, 0.256 mmol) and AIBN (0.4 mg, 0.00244 mmol) were added at room temperature and, and the mixture was allowed to warm to 100 °C. After stirring for 15 min at 100 °C, concentration under reduced pressure gave an oily residue, which was purified by flash chromatography over silica gel with *n*-hexane–EtOAc (2:1) to give **27** as a colorless oil (12.9 mg, 45% yield): [ $\alpha$ ]<sub>D</sub><sup>25</sup> –24.6 (*c* 1.29, CHCl<sub>3</sub>); IR (neat): 2932 (OH); <sup>1</sup>H NMR (500 MHz, CDCl<sub>3</sub>)  $\delta$  0.92 (t, *J* = 7.4 Hz, 3H), 1.06 (s, 9H), 1.27 (s, 3H), 1.38 (s, 3H), 1.39–1.51 (m, 2H), 1.64–1.74 (m, 2H), 1.81 (br s, 1H), 1.92–2.08 (m, 4H), 3.37 (dd, *J* = 11.5, 5.7 Hz, 1H), 3.50–3.55 (m, 1H), 3.63 (dd, *J* = 11.5, 3.4 Hz, 1H), 3.69–3.72

(m, 1H), 3.83–3.88 (m, 1H), 3.94–3.97 (m, 1H), 4.09–4.15 (m, 1H), 4.20 (ddd,  $J = 5.2, 5.2, 5.2$  Hz, 1H), 4.53–4.58 (m, 1H), 7.33–7.45 (m, 6H), 7.01–7.75 (m, 4H);  $^{13}\text{C}$  NMR (125 MHz,  $\text{CDCl}_3$ )  $\delta$  8.5, 25.5, 26.8, 27.0 (3C), 27.8, 28.1, 29.6 (2C), 36.1, 73.7, 74.3, 77.3, 79.2, 80.8, 81.3, 81.4, 82.4, 106.0, 127.4 (4C), 129.5 (2C), 134.4 (2C), 136.0 (4C); HRMS (ESI) calcd for  $\text{C}_{32}\text{H}_{46}\text{NaO}_6\text{Si}$   $[\text{M}+\text{Na}]^+$ , 577.2961; found: 577.2959.

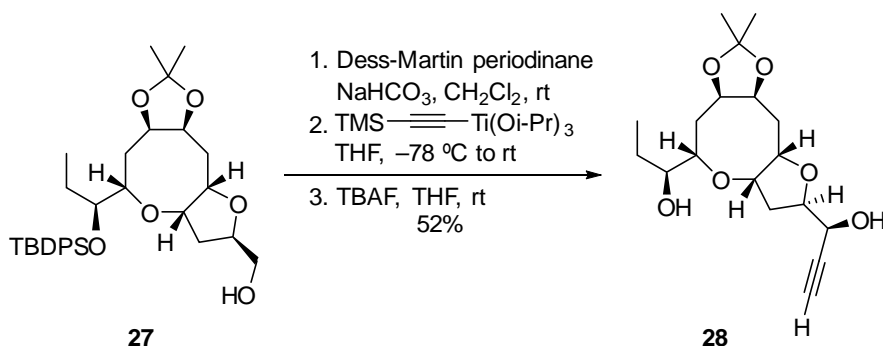

**(S)-1-((3aR,5S,6aS,8R,9aS,10aS)-5-((S)-1-Hydroxypropyl)-2,2-dimethyloctahydro-3aH-[1,3]-dioxolo[4,5-e]furo[3,2-b]oxocin-8-yl)prop-2-yn-1-ol (28).** To a stirred solution of **27** (16.5 mg, 0.0297 mmol) and  $\text{NaHCO}_3$  (10.0 mg, 0.119 mmol) in  $\text{CH}_2\text{Cl}_2$  (1.0 mL) was added Dess-Martin periodinane (25.0 mg, 0.0589 mmol) at room temperature. After stirring for 40 min at this temperature, the mixture was quenched by addition of saturated  $\text{Na}_2\text{S}_2\text{O}_3$ . The whole was extracted with  $\text{CH}_2\text{Cl}_2$ , dried over  $\text{MgSO}_4$ . The filtrate was concentrated under reduced pressure to give crude aldehyde, which was used without further purification. To a stirred solution of trimethylsilyl-acetylene (42  $\mu\text{L}$ , 0.296 mmol) in  $\text{Et}_2\text{O}$  (1.5 mL) was added  $n\text{-BuLi}$  in  $n\text{-hexane}$  (1.65 M; 135  $\mu\text{L}$ , 0.222 mmol) at  $-78^\circ\text{C}$ , and the mixture was stirred for 5 min at room temperature. To the mixture of the resulting acetylide was added dropwise  $\text{Ti}(\text{O}-i\text{-Pr})_3\text{Cl}$  (1.0 M in THF, 210  $\mu\text{L}$ , 0.210 mmol) at  $-78^\circ\text{C}$ . After 30 min at  $-78^\circ\text{C}$ , the above crude aldehyde in  $\text{Et}_2\text{O}$  (1.5 mL) was added dropwise to this reagent and the mixture was allowed to warm to room temperature. After stirring for 10 min at this temperature, The mixture was filtered through a short pad of silica gel to give crude propargyl alcohol, which was used without further purification. To a above propargyl alcohol, TBAF (1.0 M in THF, 500  $\mu\text{L}$ , 0.50 mmol) was added at room temperature and the mixture was warmed to  $50^\circ\text{C}$ . The mixture was stirred at this temperature for 5 h, which was directly purified by flash chromatography over silica gel with  $\text{EtOAc}$  to give **28** as a colorless oil (5.3 mg, 52% yield):  $[\alpha]_D^{25} -2.6$  ( $c$  0.29,  $\text{CHCl}_3$ ); IR (neat): 2935 (OH), 2338 ( $\text{C}\equiv\text{C}$ );  $^1\text{H}$  NMR (500 MHz,  $\text{CDCl}_3$ )  $\delta$  1.02 (t,  $J = 6.9$  Hz, 3H), 1.31 (s, 3H), 1.40 (s, 3H), 1.40–1.48 (m, 1H), 1.59–1.68 (m, 1H), 1.98–2.16 (m, 5H), 2.23–2.31 (m, 1H), 2.40 (d,  $J = 2.3$  Hz, 1H), 2.42 (d,  $J = 2.3$  Hz, 1H), 2.44–2.49 (m, 1H), 3.36–3.42 (m, 1H), 3.51–3.58 (m, 1H), 3.92–3.97 (m, 1H), 4.13–4.18 (m, 1H), 4.25–4.35 (m, 2H), 4.45–4.50 (m, 1H), 4.54–4.63 (m, 1H);  $^{13}\text{C}$  NMR (125 MHz,  $\text{CDCl}_3$ )  $\delta$  9.7, 25.6, 26.0, 28.2, 30.1, 32.2, 35.8, 64.3, 73.1 (2C), 73.7, 74.3, 79.2, 80.8, 81.3, 81.4, 82.4, 106.4; HRMS (FAB) calcd for  $\text{C}_{18}\text{H}_{28}\text{NaO}_6$   $[\text{M}+\text{Na}]^+$ , 363.1784; found: 363.1783.

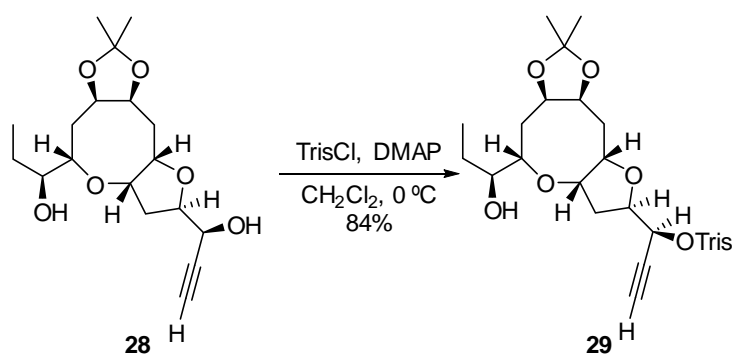

**(S)-1-((3a*R*,5*S*,6a*S*,8*R*,9a*S*,10a*S*)-5-((*S*)-1-hydroxypropyl)-2,2-dimethyloctahydro-3a*H*-[1,3]-dioxolo[4,5-*e*]furo[3,2-*b*]oxocin-8-yl)prop-2-yn-1-yl 2,4,6-triisopropylbenzenesulfonate (29).** To a stirred solution of **28** (15.0 mg, 0.0441 mmol) in CH<sub>2</sub>Cl<sub>2</sub> (1.5 mL) were added DMAP (54.0 mg, 0.443 mmol) and TrisCl (67.0 mg, 0.221 mmol) at –30 °C, and the mixture was warmed to –20 °C. After stirring for 2 h at this temperature, the mixture was quenched by addition of MeOH. The mixture was purified by flash chromatography over silica gel with *n*-hexane–EtOAc (2:1) to give **29** as a colorless oil (22.6 mg, 84% yield): [ $\alpha$ ]<sub>D</sub><sup>25</sup> +1.55 (*c* 2.26, CHCl<sub>3</sub>); IR (neat): 2361 (C=C=C), 1349 (OSO<sub>2</sub>); <sup>1</sup>H NMR (400 MHz, CDCl<sub>3</sub>)  $\delta$  1.01 (t, *J* = 7.0 Hz, 3H), 1.19–1.49 (m, 26H), 1.57–1.68 (m, 1H), 1.93–2.07 (m, 4H), 2.07–2.15 (m, 1H), 2.17–2.25 (m, 1H), 2.27 (d, *J* = 2.3 Hz, 1H), 2.41 (d, 2.3 Hz, 1H), 2.85–2.97 (m, 1H), 3.32–3.43 (m, 1H), 3.47–3.58 (m, 1H), 3.84–3.99 (m, 1H), 4.00–4.08 (m, 1H), 4.09–4.18 (m, 1H), 4.26 (ddd, *J* = 9.8, 4.6, 4.6 Hz, 1H), 4.40 (ddd, *J* = 9.8, 6.4, 3.5 Hz, 1H), 4.51–4.59 (ddd, *J* = 9.8, 5.8, 2.3 Hz, 1H), 5.25 (dd, *J* = 3.5, 2.3 Hz, 1H), 7.16 (s, 2H); <sup>13</sup>C NMR (100 MHz, CDCl<sub>3</sub>)  $\delta$  9.65, 23.5 (4C), 24.6, 24.8, 25.7, 25.9, 28.2, 29.7, 30.1, 31.9, 34.2, 36.7 (2C), 71.2, 73.0 (2C), 73.6, 76.6, 77.2, 77.9, 80.6, 81.4, 81.8, 106.1, 123.7 (2C), 130.7, 150.7, 153.8 (2C); HRMS (ESI) calcd for C<sub>33</sub>H<sub>50</sub>NaO<sub>8</sub>S [M+Na]<sup>+</sup>, 629.3124; found: 629.3123.

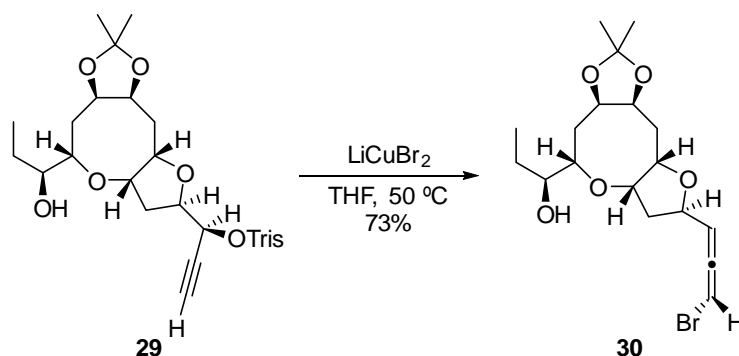

**(S)-1-((3a*R*,5*S*,6a*S*,8*R*,9a*S*,10a*S*)-8-[(*S*)-3-Bromoprop-1,2-dien-1-yl]-2,2-dimethyloctahydro-3a*H*-[1,3]dioxolo[4,5-*e*]furo[3,2-*b*]oxocin-5-yl)propan-1-ol (30).**

A mixture of CuBr (53.3 mg, 0.373 mmol) and LiBr (32.5 mg, 0.373 mmol) was dissolved in THF (1.8 mL) at room temperature under argon and stirred for 30 min at this temperature. To this mixture was added a solution of **29** (22.6 mg, 0.0372 mmol) in THF (1.8 mL) at room temperature. The mixture was allowed to warm to 50 °C and stirred at this temperature for 2 h, which was quenched by addition of saturated NH<sub>4</sub>Cl. The whole was extracted with EtOAc, and the extract was dried over MgSO<sub>4</sub>. The filtrate was concentrated under reduced pressure to give an oily residue,

which was purified by flash chromatography over silica gel with *n*-hexane–EtOAc (2:1) to give **30** as a colorless oil (10.9 mg, 73% yield) with small amount of impurity:  $[\alpha]^{25}_{\text{D}} +68.4$  (*c* 0.11, CHCl<sub>3</sub>); IR (neat): 2931 (OH), 2355 (C=C=C); <sup>1</sup>H NMR (500 MHz, CDCl<sub>3</sub>)  $\delta$  1.01 (t, *J* = 6.9 Hz, 3H), 1.32 (s, 3H), 1.40 (s, 3H), 1.40–1.50 (m, 1H), 1.57–1.69 (m, 1H), 1.94–2.16 (m, 5H), 2.15–2.24 (m, 1H), 3.34–3.43 (m, 1H), 3.49–3.57 (m, 1H), 3.89–3.99 (m, 1H), 3.99–4.06 (m, 1H), 4.26–4.34 (m, 1H), 4.52–4.63 (m, 1H), 4.73–4.81 (m, 1H), 5.48 (dd, *J* = 5.5, 5.5 Hz, 1H), 6.06 (dd, *J* = 5.5, 1.8 Hz, 1H); <sup>13</sup>C NMR (125 MHz, CDCl<sub>3</sub>)  $\delta$  9.7, 25.6, 26.0, 28.1, 29.7, 30.3, 41.1, 73.1 (2C), 73.7, 74.0, 79.1, 81.4 (2C), 82.2, 102.3, 106.1, 201.2; HRMS (ESI) calcd for C<sub>18</sub>H<sub>27</sub>BrNaO<sub>5</sub> [M+Na]<sup>+</sup>, 425.0940; found: 425.0933.

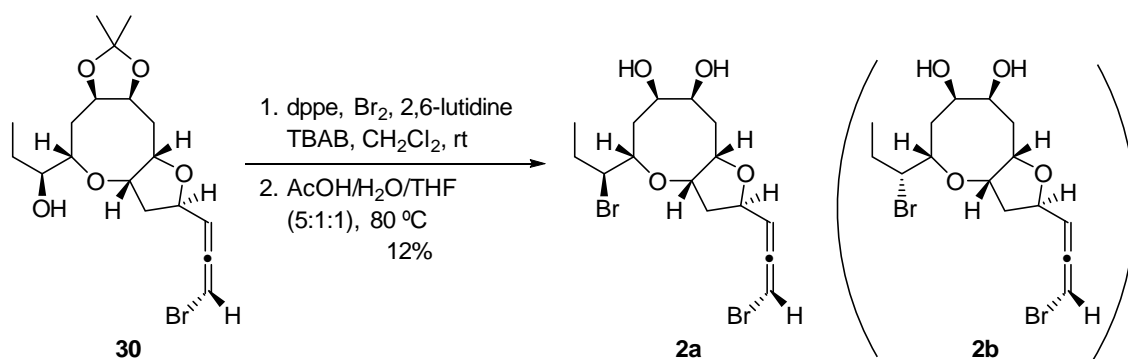

**(2*R*,3*aS*,5*S*,7*R*,8*S*,9*aS*)-2-[(*S*)-3-Bromopropa-1,2-dien-1-yl]-5-[1-bromopropyl]octahydro-2*H*-furo[3,2-*b*]oxocine-7,8-diol (2*a*/2*b*) (Possible Isomers of Laurendecumallene B; not Completely Characterized).** To the solution of Br<sub>2</sub> (3.6 mg, 0.0225 mmol) in CH<sub>2</sub>Cl<sub>2</sub> (300  $\mu$ L) was added dppe (4.5 mg, 0.0113 mmol) at room temperature. After stirring for 10 min at this temperature, a mixture of **30** (2.3 mg, 0.00571 mmol), TBAB (18.4 mg, 0.0568 mmol) and 2,6-lutidine (2.6  $\mu$ L, 0.0261 mmol) in THF (200  $\mu$ L) was added to this reagent at room temperature. The mixture was stirred at this temperature for 18 h, which was filtered through a short pad of silica gel to give crude bromide, which was used without further purification. A mixed solvent of AcOH/THF/H<sub>2</sub>O (560  $\mu$ L, 5:1:1) was added to a flask containing the above bromide and the mixture was stirred at 80 °C for 4 h. The mixture was concentrated under reduced pressure to give an oily residue, which was purified by flash chromatography over silica gel with *n*-hexane–EtOAc (1:1) to give crude **2a** (or **2b**) containing some impurities as a colorless oil (0.3 mg, 12% yield);  $[\alpha]^{25}_{\text{D}} +63.1$ , (*c* 0.03, CHCl<sub>3</sub>), [lit  $[\alpha]^{18}_{\text{D}} +60.6$  (*c* 0.33, CHCl<sub>3</sub>)]<sup>4</sup>; IR (neat): 2941 (OH); <sup>1</sup>H NMR (500 MHz, CDCl<sub>3</sub>)  $\delta$  1.07 (t, *J* = 7.3 Hz, 3H), 1.73–1.81 (m, 1H), 1.94–2.14 (m, 5H), 2.15–2.23 (m, 1H), 2.36–2.45 (m, 1H), 3.79–3.85 (m, 1H), 3.85–3.90 (m, 1H), 4.08–4.13 (m, 1H), 4.15–4.24 (m, 2H), 4.29–4.34 (m, 1H), 4.72–4.80 (m, 1H), 5.42–5.48 (m, 1H), 6.06 (dd, *J* = 5.5, 1.8 Hz, 1H); HRMS (ESI) calcd for C<sub>15</sub>H<sub>22</sub>Br<sub>2</sub>NaO<sub>4</sub> [M+Na]<sup>+</sup>, 448.9762; found: 448.9762.



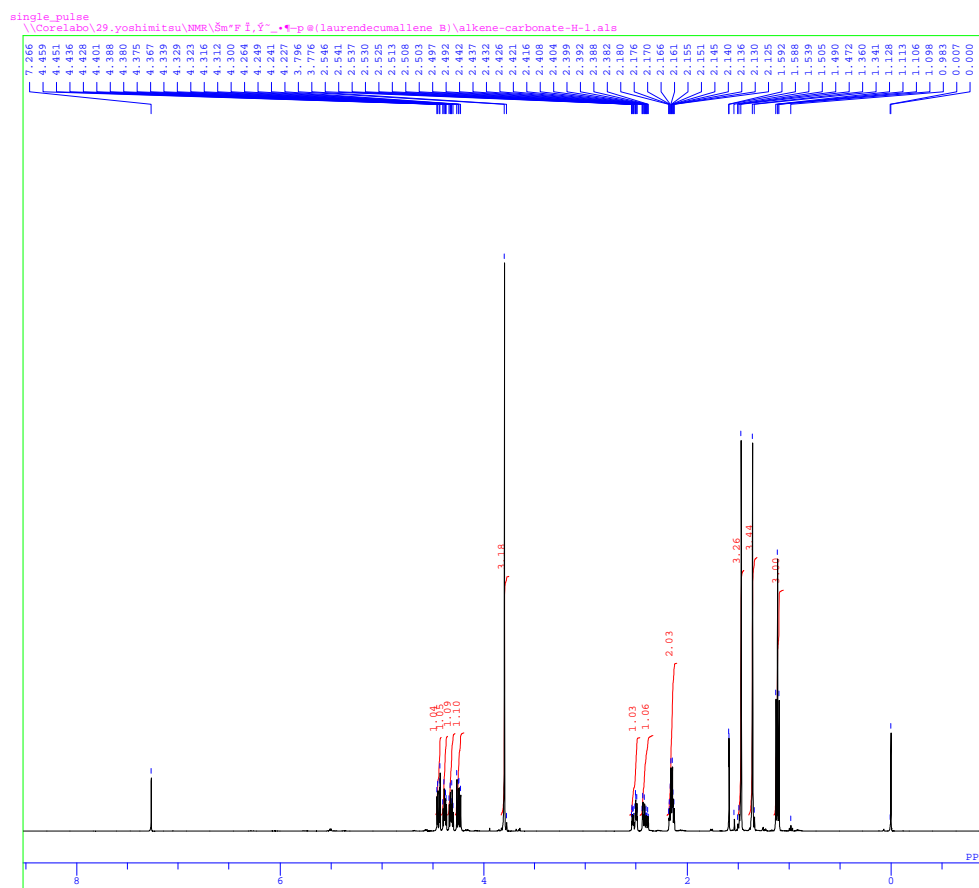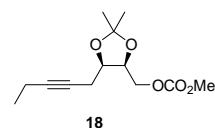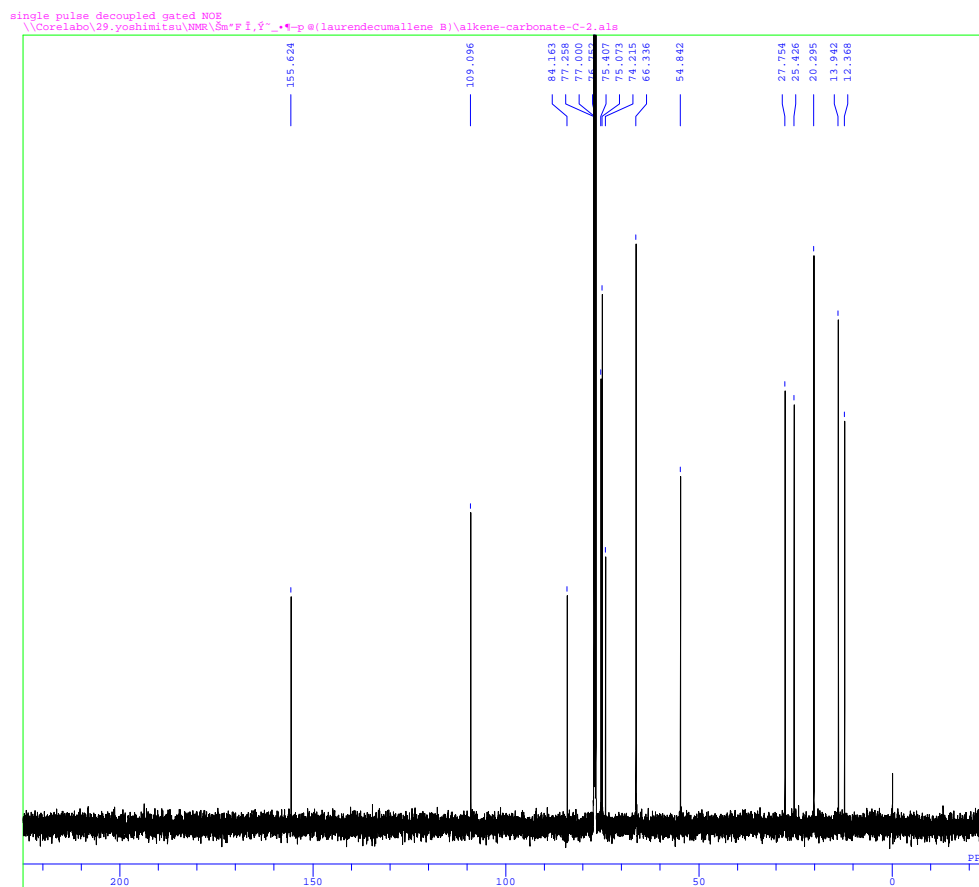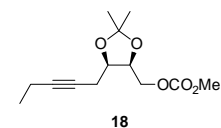

single\_pulse  
 \Corelab\29.yoshimitsu\NMR\5m\*F1.f - \*p@laurendecumallene B\after-birch-H.als

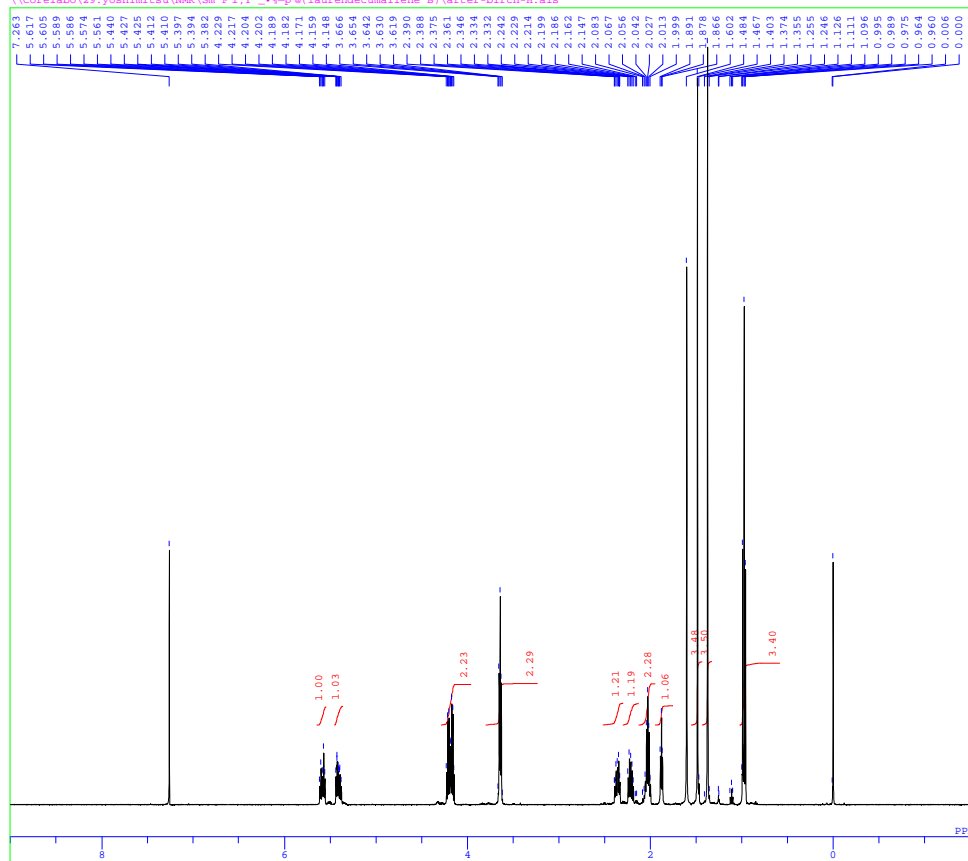

DFILE after-birch-H.als  
 COMNT single\_pulse  
 DATIM 2012-08-02 11:02:52  
 OBNUC 1H  
 EXMOD single\_pulse.ex2  
 OBFRQ 500.16 MHz  
 OBSET 2.41 KHz  
 OBFIN 6.01 Hz  
 POINT 13107  
 FREQU 7507.39 Hz  
 SCANS 8  
 ACQTM 1.7459 sec  
 PD 5.0000 sec  
 FW1 6.50 usec  
 IRNUC 1H  
 CTEMP 25.9 c  
 SLVNT CDCL3  
 EXREF 0.00 ppm  
 BF 0.12 Hz  
 RGAIN 46

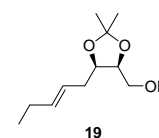

single\_pulse decoupled gated N05  
 \Corelab\29.yoshimitsu\NMR\5m\*F1.f - \*p@laurendecumallene B\after-birch-C.als

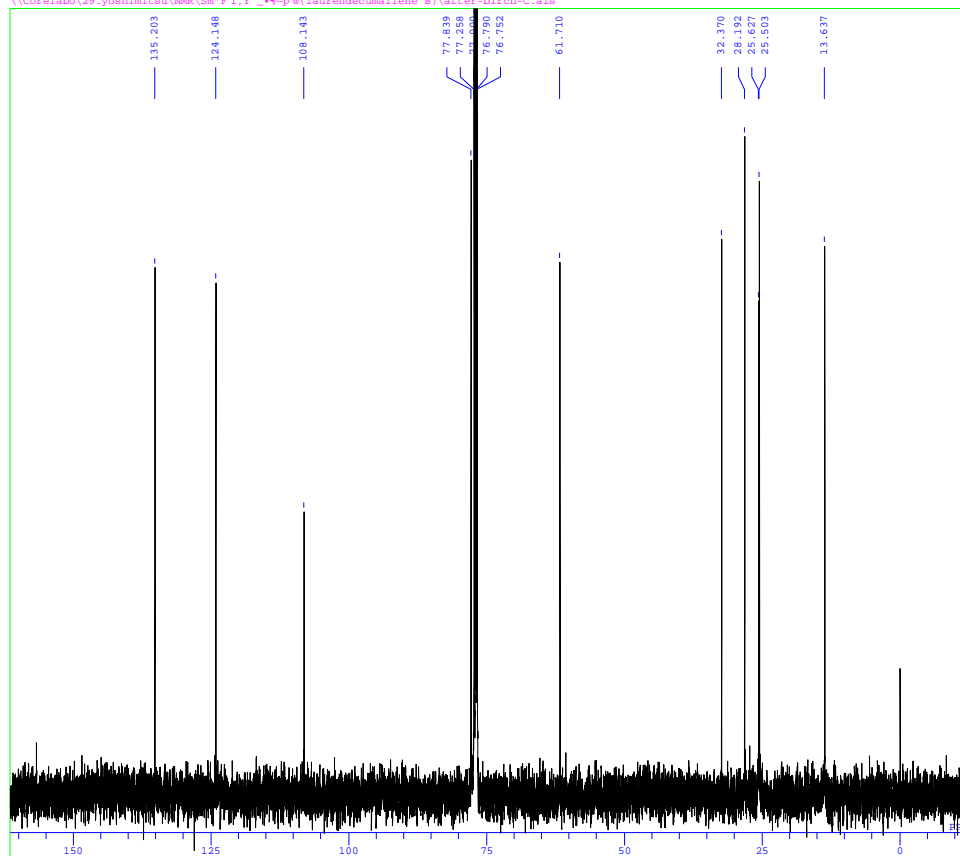

DFILE after-birch-C.als  
 COMNT single\_pulse decoupled  
 DATIM 2012-08-02 11:50:48  
 OBNUC 13C  
 EXMOD single\_pulse\_dec  
 OBFRQ 125.77 MHz  
 OBSET 7.87 KHz  
 OBFIN 4.21 Hz  
 POINT 26214  
 FREQU 31446.06 Hz  
 SCANS 1000  
 ACQTM 0.8336 sec  
 PD 2.0000 sec  
 FW1 3.73 usec  
 IRNUC 1H  
 CTEMP 26.3 c  
 SLVNT CDCL3  
 EXREF 77.00 ppm  
 BF 1.20 Hz  
 RGAIN 54

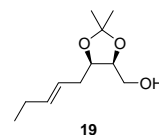

single\_pulse  
\\Corelabo\29.yoshimitsu\NMR\Sm\*F i, \$^-\$-.\*-p@(lauredecumallene B)\alkyne-acetonide-PMP-1.als

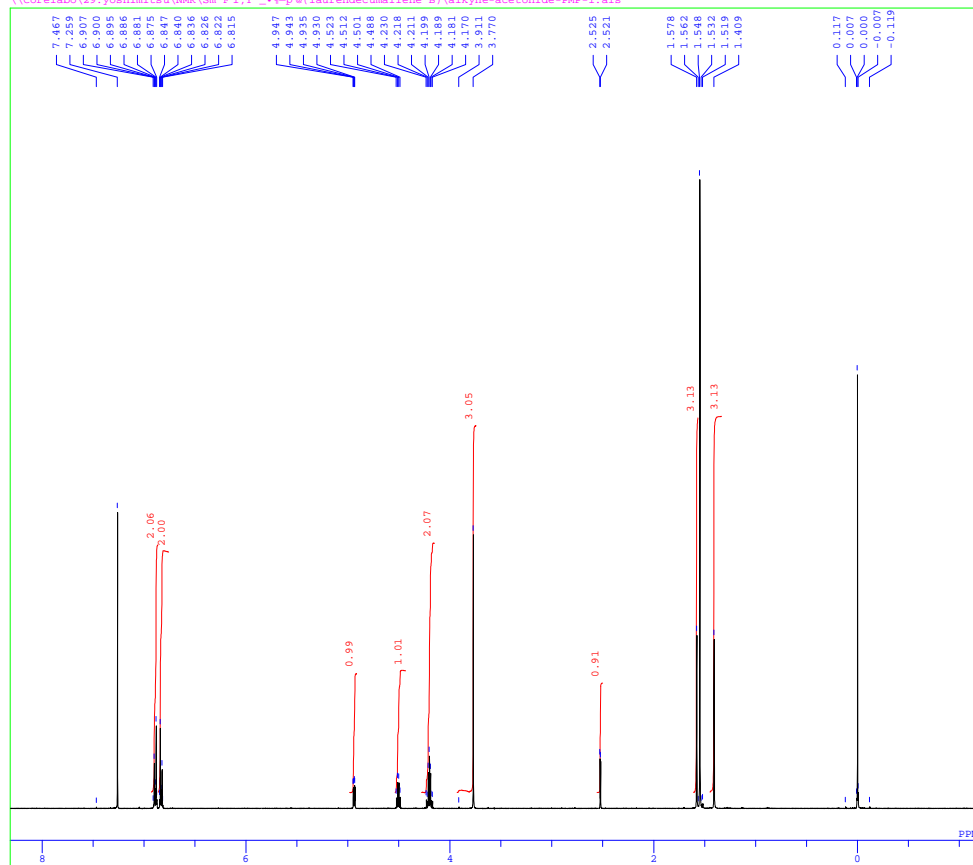

DFILE alkyne-acetonide-PMP-1  
COMNT single\_pulse  
DATIM 2012-07-25 20:53:08  
OBNUC 1H  
EXMOD single\_pulse.ex2  
OBFRQ 500.16 MHz  
OBSET 2.41 KHz  
OBFIN 6.01 Hz  
POINT 13107  
FREQU 7507.39 Hz  
SCANS 8  
ACQTM 1.7459 sec  
PD 5.0000 sec  
PWL 6.50 usec  
IRNUC 1H  
CTEMP 28.1 c  
SLVNT CDCL3  
EXREF 0.00 ppm  
BF 0.12 Hz  
RGAIN 52

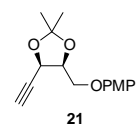

single pulse decoupled gated NOE  
\\Corelabo\29.yoshimitsu\NMR\Sm\*F i, \$^-\$-.\*-p@(lauredecumallene B)\alkyne-acetonide-PMP-C-1.jdf

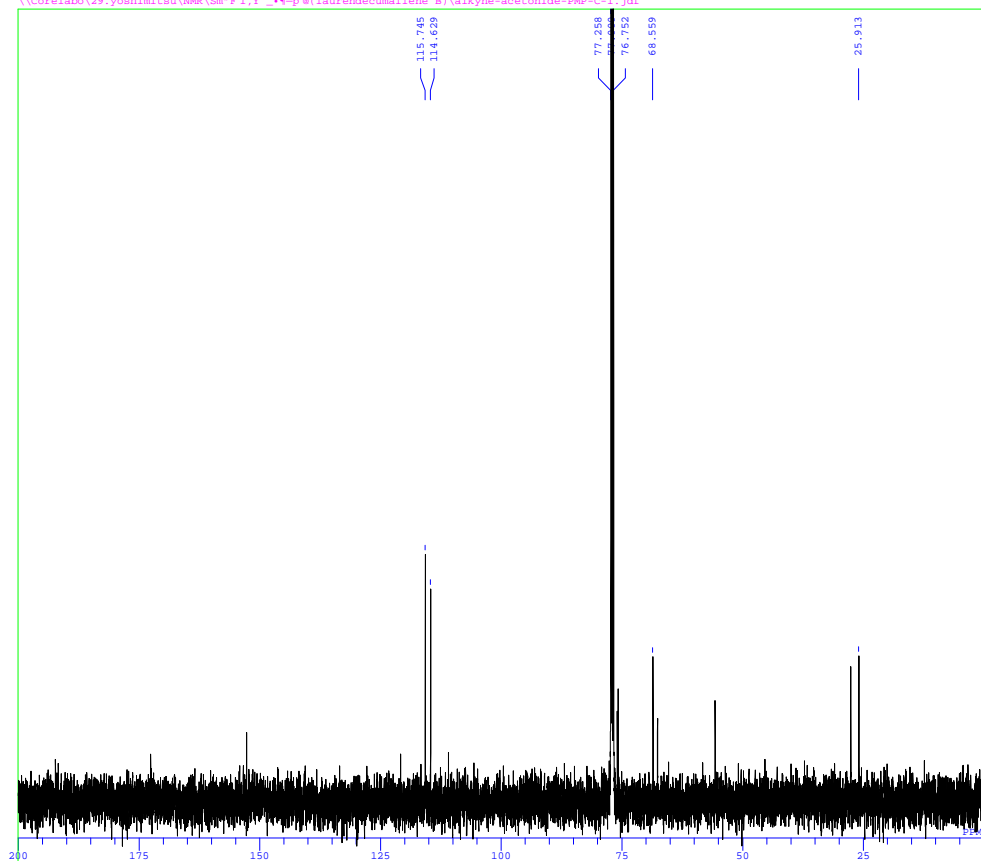

DFILE alkyne-acetonide-PMP-C  
COMNT single pulse decoupled  
DATIM 2012-07-25 21:41:22  
OBNUC 13C  
EXMOD single\_pulse\_dec  
OBFRQ 125.77 MHz  
OBSET 7.87 KHz  
OBFIN 4.21 Hz  
POINT 32768  
FREQU 39308.18 Hz  
SCANS 1000  
ACQTM 0.8336 sec  
PD 2.0000 sec  
PWL 3.73 usec  
IRNUC 13C  
CTEMP 28.6 c  
SLVNT CDCL3  
EXREF 77.00 ppm  
BF 1.20 Hz  
RGAIN 54

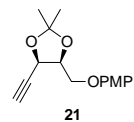

single\_pulse  
 \\Corelabo\29.yoshimitsu\NMR\8m\*Ff.γ~.\*-p@laurendecumallene B\alkyne-carbonate-PMP-H-1.als

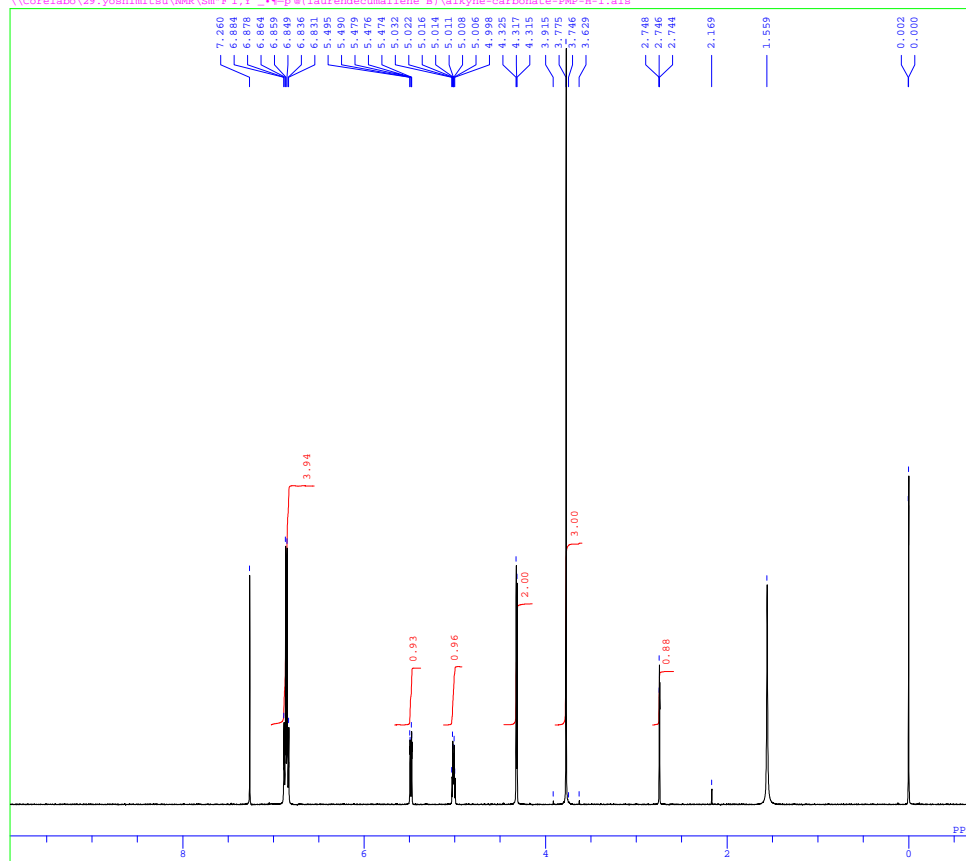

DFILE alkyne-carbonate-PMP-H-  
 COMNT single\_pulse  
 DATIM 2012-07-26 12:24:06  
 OBNUC 1H  
 EXMOD single\_pulse.ex2  
 OBFRQ 500.16 MHz  
 OBSET 2.41 KHz  
 OBFIN 6.01 Hz  
 POINT 13107  
 FREQU 7507.39 Hz  
 SCANS 8  
 ACQTM 1.7459 sec  
 PD 5.0000 sec  
 PW1 6.50 usec  
 IRNUC 1H  
 CTEMP 27.9 c  
 SLVNT CDCL3  
 EXREF 0.00 ppm  
 RF 0.12 Hz  
 RGAIN 50

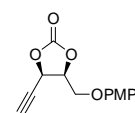

22

single\_pulse decoupled gated NOE  
 \\Corelabo\29.yoshimitsu\NMR\8m\*Ff.γ~.\*-p@laurendecumallene B\alkyne-carbonate-PMP-C-1.als

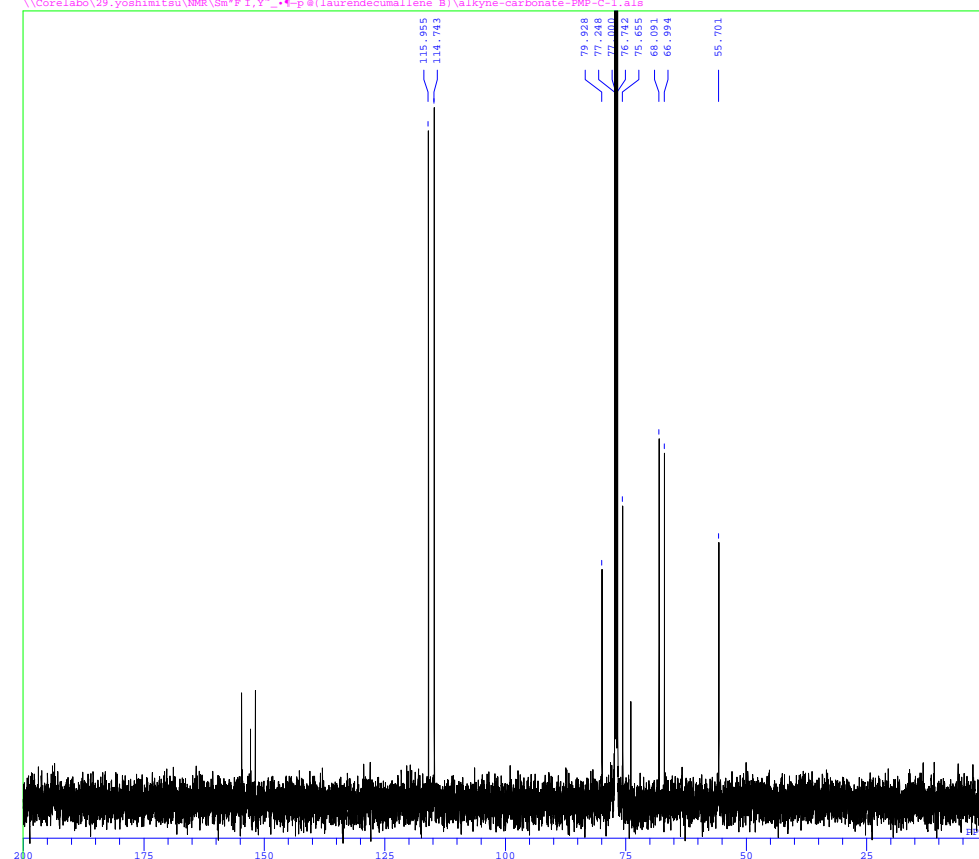

DFILE alkyne-carbonate-PMP-C-  
 COMNT single\_pulse decoupled  
 DATIM 2012-07-26 13:11:60  
 OBNUC 13C  
 EXMOD single\_pulse\_dec  
 OBFRQ 125.77 MHz  
 OBSET 7.87 KHz  
 OBFIN 4.21 Hz  
 POINT 26214  
 FREQU 31446.06 Hz  
 SCANS 1000  
 ACQTM 0.8336 sec  
 PD 2.0000 sec  
 PW1 3.73 usec  
 IRNUC 1H  
 CTEMP 29.2 c  
 SLVNT CDCL3  
 EXREF 77.00 ppm  
 RF 1.20 Hz  
 RGAIN 54

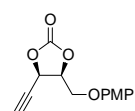

22

single\_pulse

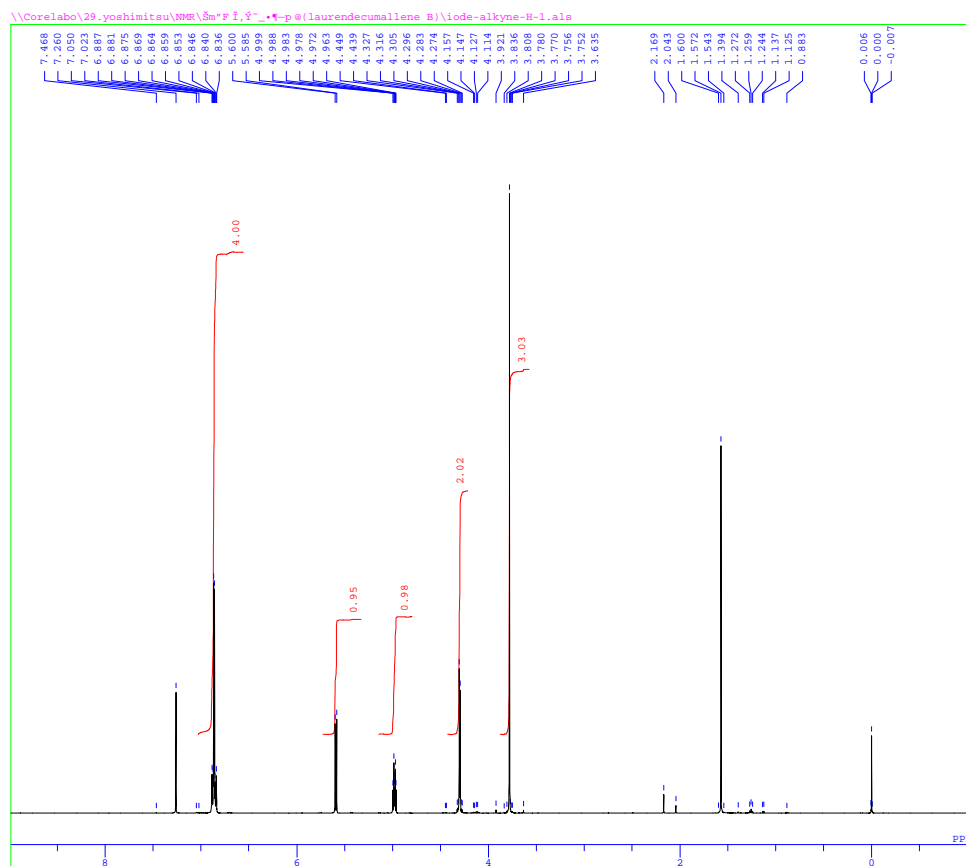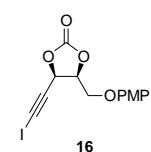

single pulse decoupled gated NOE

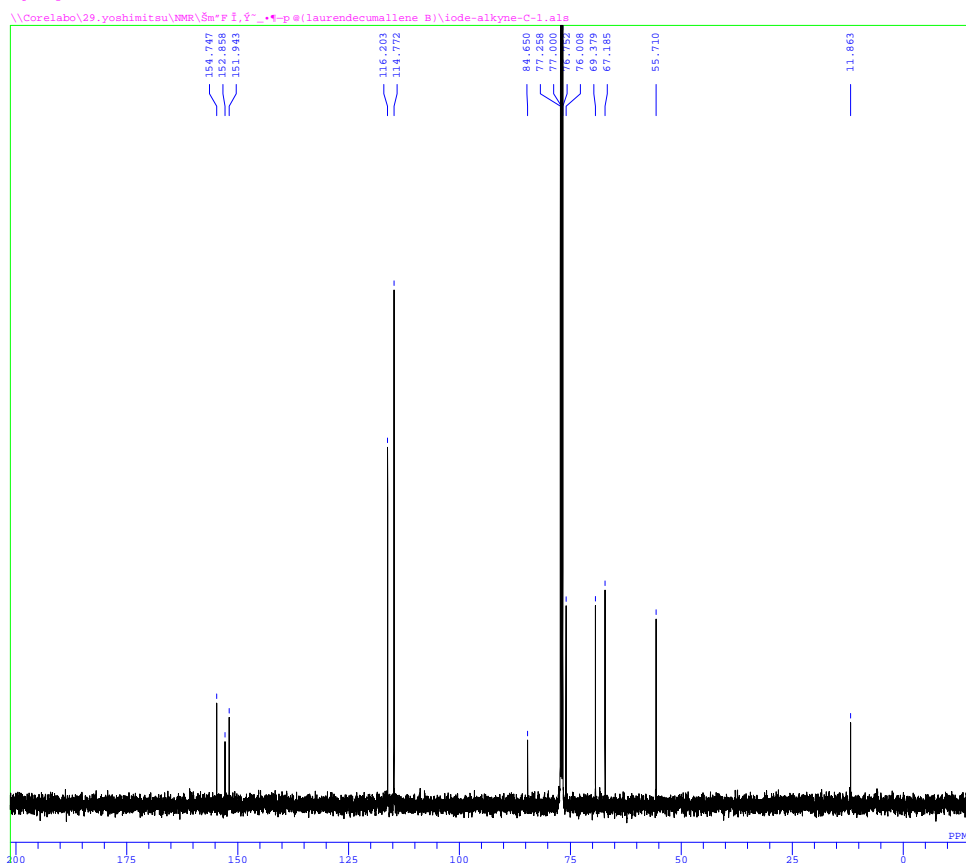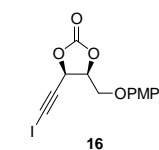

single\_pulse  
 \Corelab\29.yoshimitsu\NMR\8m\*F1.f\*-.\*-p@laurendecumallene B\kxntate.als

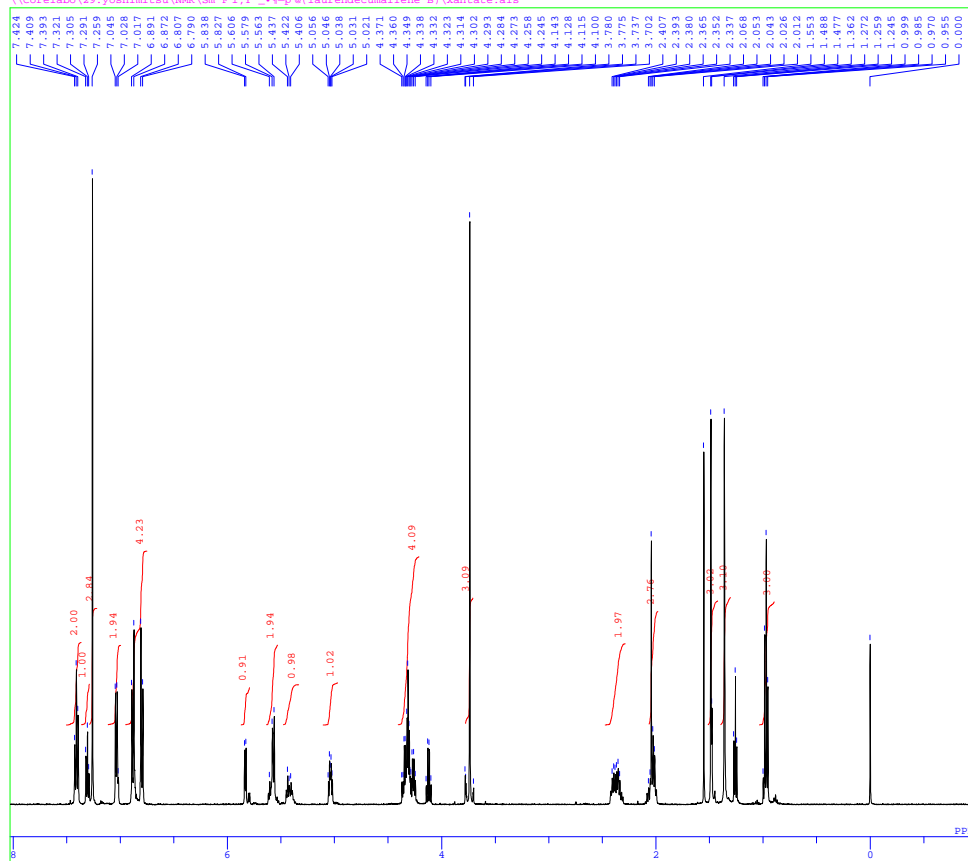

DFILE kxntate.als  
 COMNT single\_pulse  
 DATIM 2013-02-26 10:58:33  
 OBNUC 1H  
 EXMOD single\_pulse.ex2  
 OBFRQ 500.16 MHz  
 OBSET 2.41 KHz  
 OBFIN 6.01 Hz  
 POINT 13107  
 FREQU 7507.39 Hz  
 SCANS 8  
 ACQTM 1.7459 sec  
 PD 5.0000 sec  
 PW1 6.50 usec  
 IRNUC 1H  
 CTEMP 26.3 c  
 SLVNT CDCL3  
 EXREF 0.00 ppm  
 BP 0.12 Hz  
 RGAIN 46

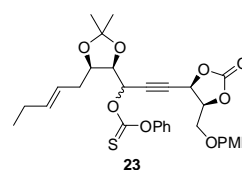

single\_pulse decoupled gated NOE  
 \Corelab\29.yoshimitsu\NMR\8m\*F1.f\*-.\*-p@laurendecumallene B\kxntate-C.als

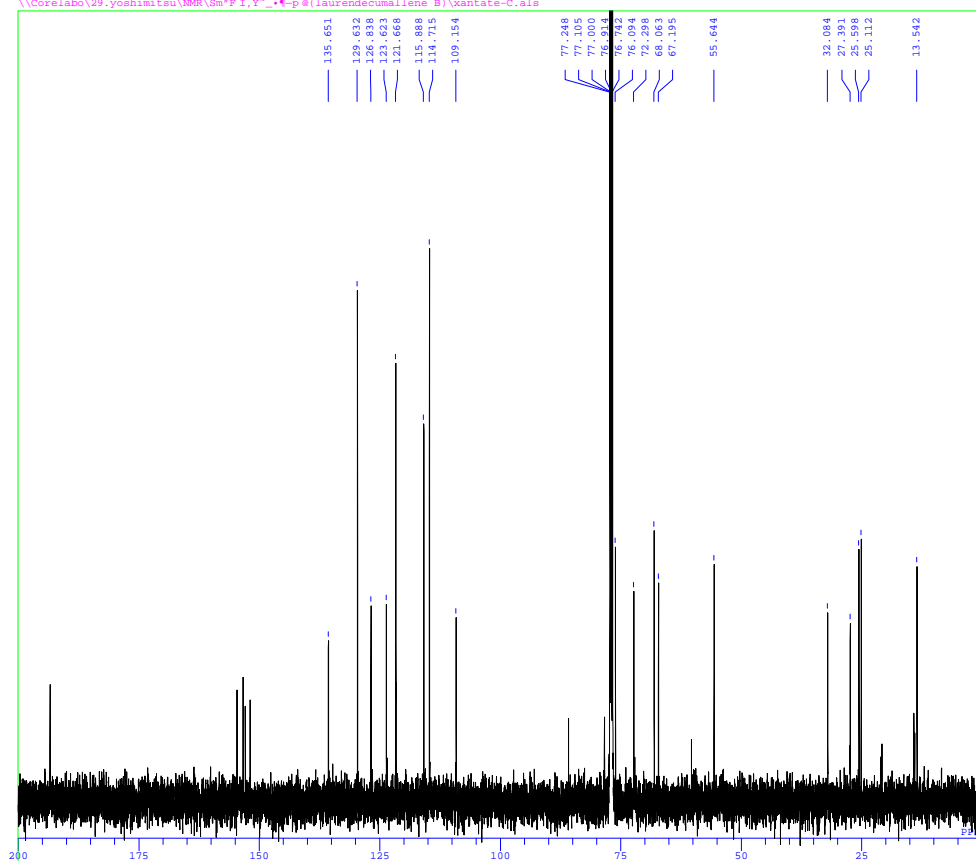

DFILE kxntate-C.als  
 COMNT single\_pulse decoupled  
 DATIM 2013-02-26 11:42:05  
 OBNUC 13C  
 EXMOD single\_pulse\_dec  
 OBFRQ 125.77 MHz  
 OBSET 7.87 KHz  
 OBFIN 4.21 Hz  
 POINT 26214  
 FREQU 31446.06 Hz  
 SCANS 909  
 ACQTM 0.8336 sec  
 PD 2.0000 sec  
 PW1 3.73 usec  
 IRNUC 13C  
 CTEMP 26.6 c  
 SLVNT CDCL3  
 EXREF 77.00 ppm  
 BP 1.20 Hz  
 RGAIN 52

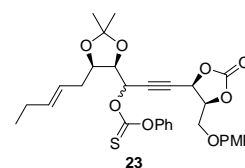

single\_pulse  
\\Correlab\29.yoshimitsu\NMR\5m\*F1.f - \*p-(laurendecumallene B)\cyc-prec-H-1.als

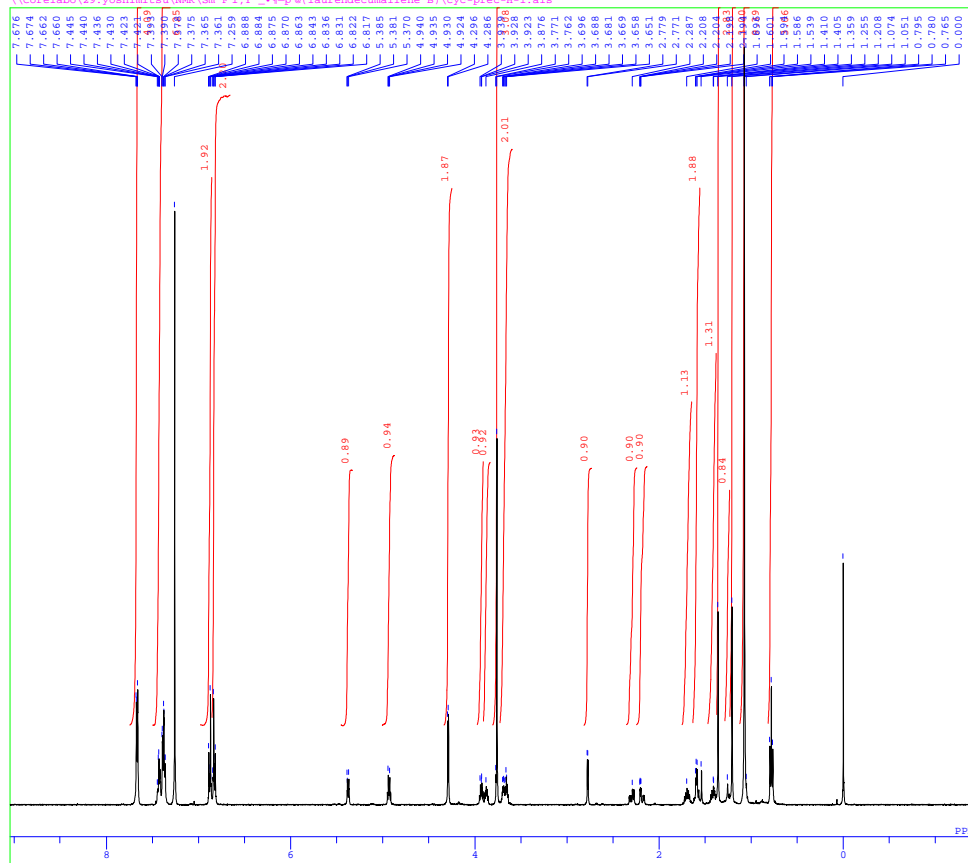

DFILE cyc-prec-H-1.als  
COMNT single\_pulse  
DATIM 2013-03-22 14:32:32  
OBNUC 1H  
EXMOD single\_pulse.ex2  
OBFRQ 500.16 MHz  
OBSET 2.41 KHz  
OBPIN 6.01 Hz  
POINT 13107  
FREQU 7507.39 Hz  
SCANS 8  
AQTM 1.7459 sec  
PD 5.0000 sec  
PW1 6.50 usec  
IRNUC 1H  
CTEMP 25.7 c  
SLVNT CDCL3  
XREF 0.00 ppm  
BF 0.12 Hz  
RGAIN 50

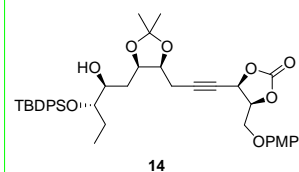

single\_pulse decoupled gated NOE  
\\10.242.96.55\c-n-l.f f\*(nmr400)\data\seizo\yoshimitsu\cyc-prec-C-1.jdf

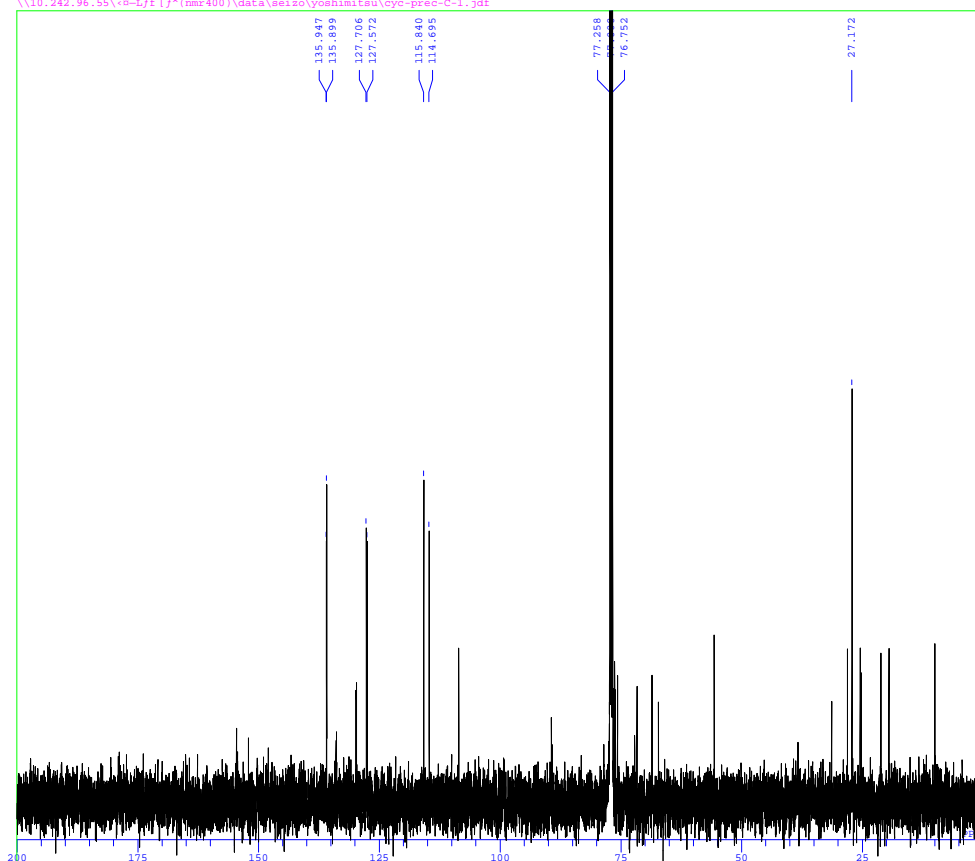

DFILE cyc-prec-C-1.jdf  
COMNT single\_pulse decoupled  
DATIM 2013-03-22 15:20:27  
OBNUC 13C  
EXMOD single\_pulse\_dec  
OBFRQ 125.77 MHz  
OBSET 7.87 KHz  
OBPIN 4.21 Hz  
POINT 32768  
FREQU 39308.18 Hz  
SCANS 1000  
AQTM 0.8336 sec  
PD 2.0000 sec  
PW1 3.73 usec  
IRNUC 1H  
CTEMP 26.0 c  
SLVNT CDCL3  
XREF 77.00 ppm  
BF 1.20 Hz  
RGAIN 54

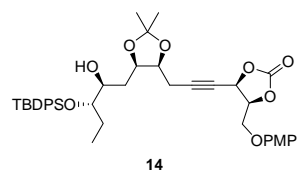

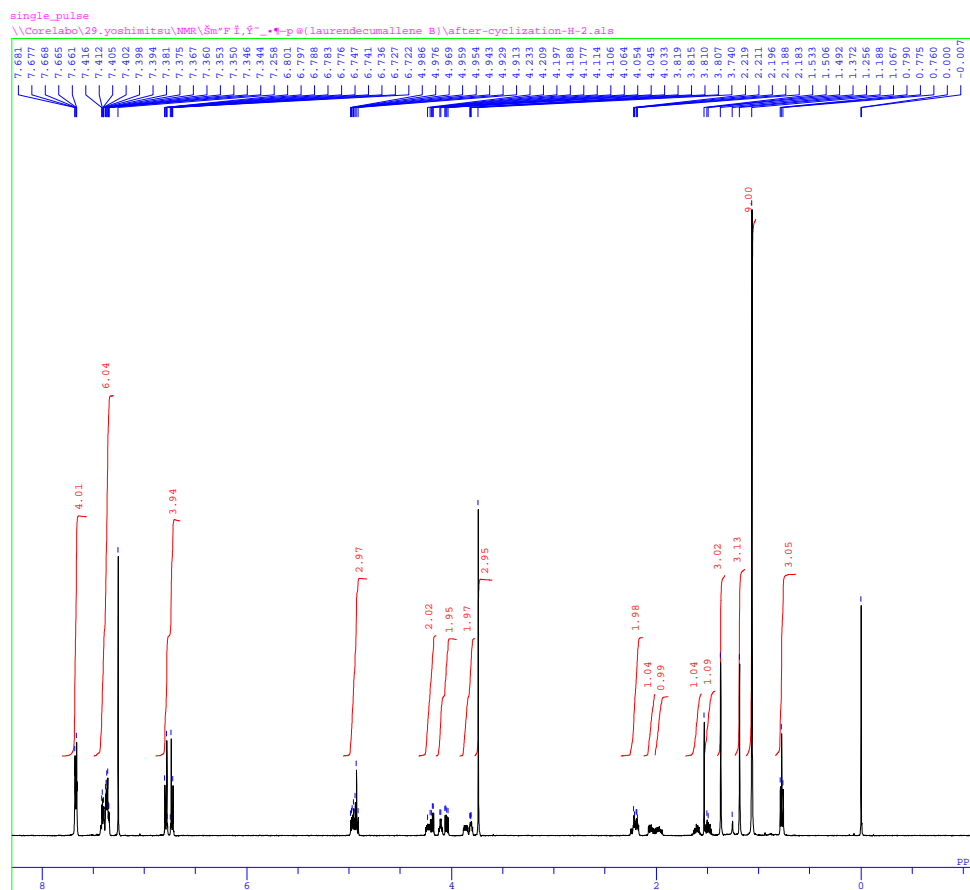

```

DFFILE after-cyclization-H-2.
COMNT single_pulse
DATIM 2012-12-18 19:47:11
OBNUC 1H
EXMOD single_pulse.ex2
OBFRQ 500.16 MHz
OBSET 2.41 KHz
OBFIN 6.01 Hz
POINT 13107
FREQU 7507.39 Hz
SCANS 8
AQTM 1.7459 sec
PD 5.0000 sec
FW 6.50 usec
IRNUC 1H
CTEMP 27.1 c
SLVNT CDCL3
EXREF 0.00 ppm
BF 0.12 Hz
RGAIN 50

```

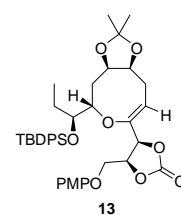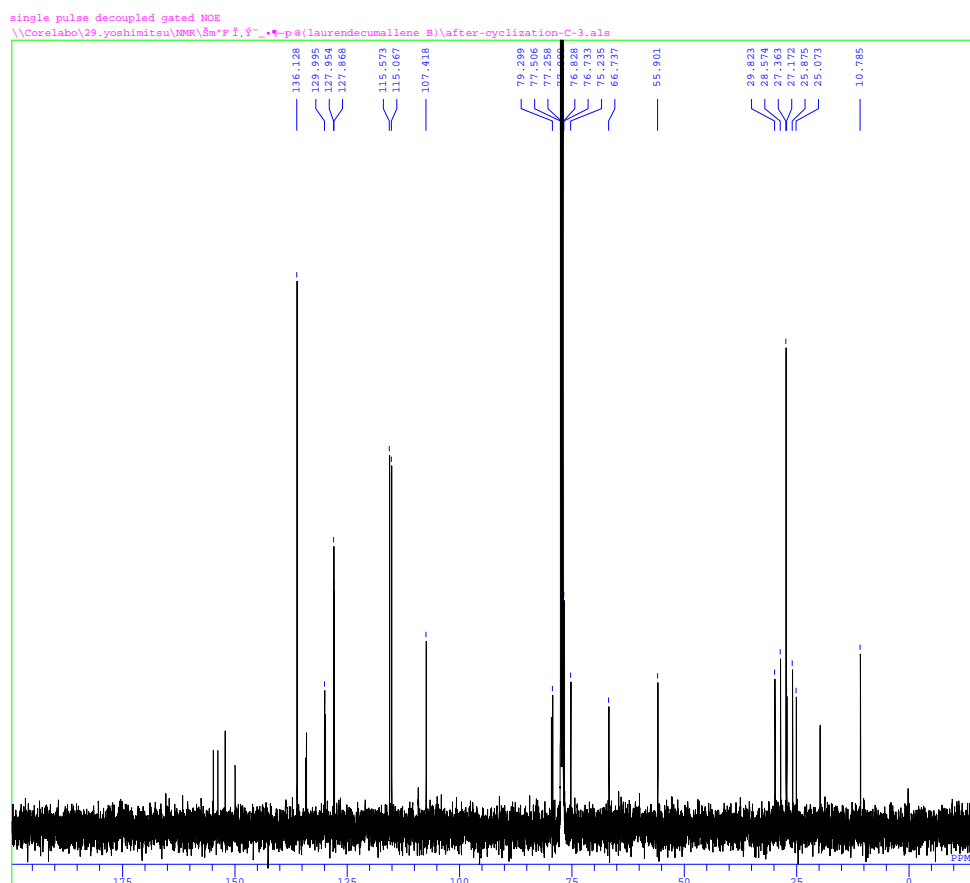

```

DFFILE after-cyclization-C-3.
COMNT single pulse decoupled
DATIM 2012-12-18 20:44:26
OBNUC 13C
EXMOD single_pulse_dec
OBFRQ 125.77 MHz
OBSET 7.87 KHz
OBFIN 4.21 Hz
POINT 26214
FREQU 31446.06 Hz
SCANS 1200
AQTM 0.8336 sec
PD 2.0000 sec
FW 3.73 usec
IRNUC 1H
CTEMP 27.6 c
SLVNT CDCL3
EXREF 77.00 ppm
BF 1.20 Hz
RGAIN 54

```

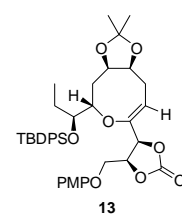



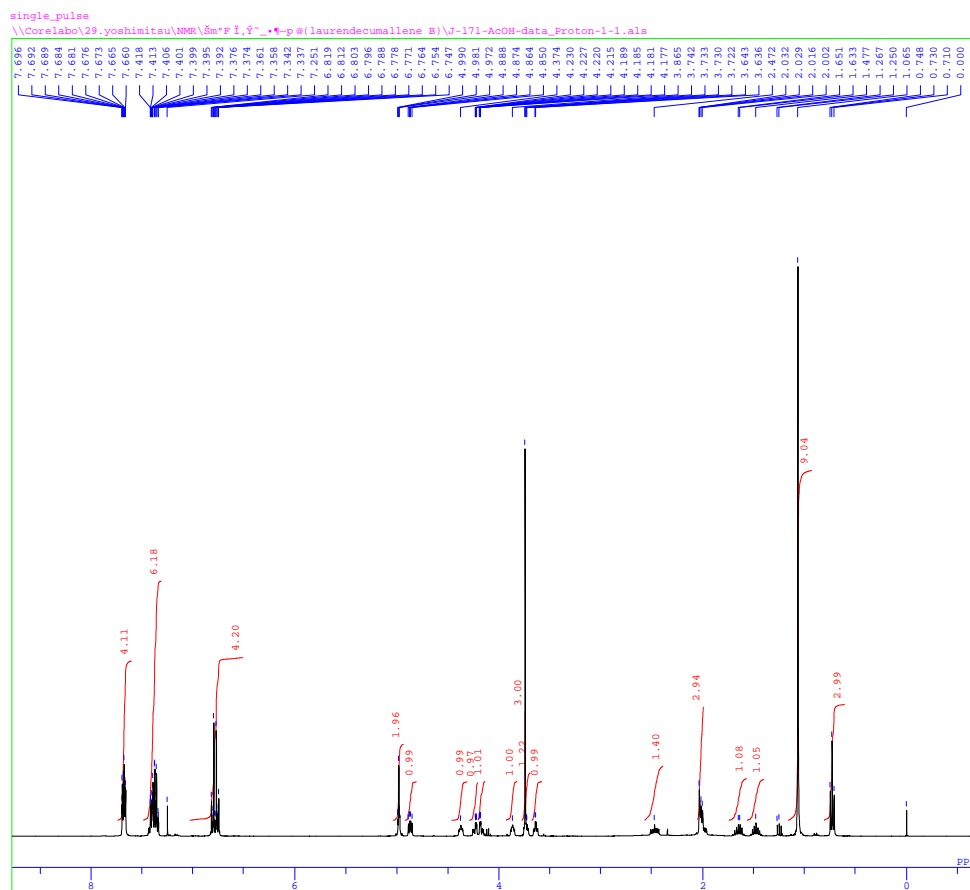

DFILE J-171-AcOH-data\_Proton-  
COMNT single\_pulse  
DATIM 2012-10-16 11:09:59  
OBNUC 1H  
EXMOD proton.jxp  
OBFRQ 399.78 MHz  
OBSET 4.19 KHz  
OBFIN 7.29 Hz  
POINT 13107  
FREQU 6002.40 Hz  
SCANS 4  
ACQTM 2.1837 sec  
PD 5.0000 sec  
PWL 4.65 usec  
IRNUC 1H  
CTEMP 24.1 c  
SLVNT CDCL3  
EXREF 0.00 ppm  
BF 0.12 Hz  
RGAIN 24

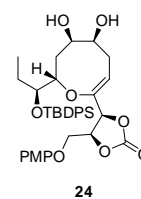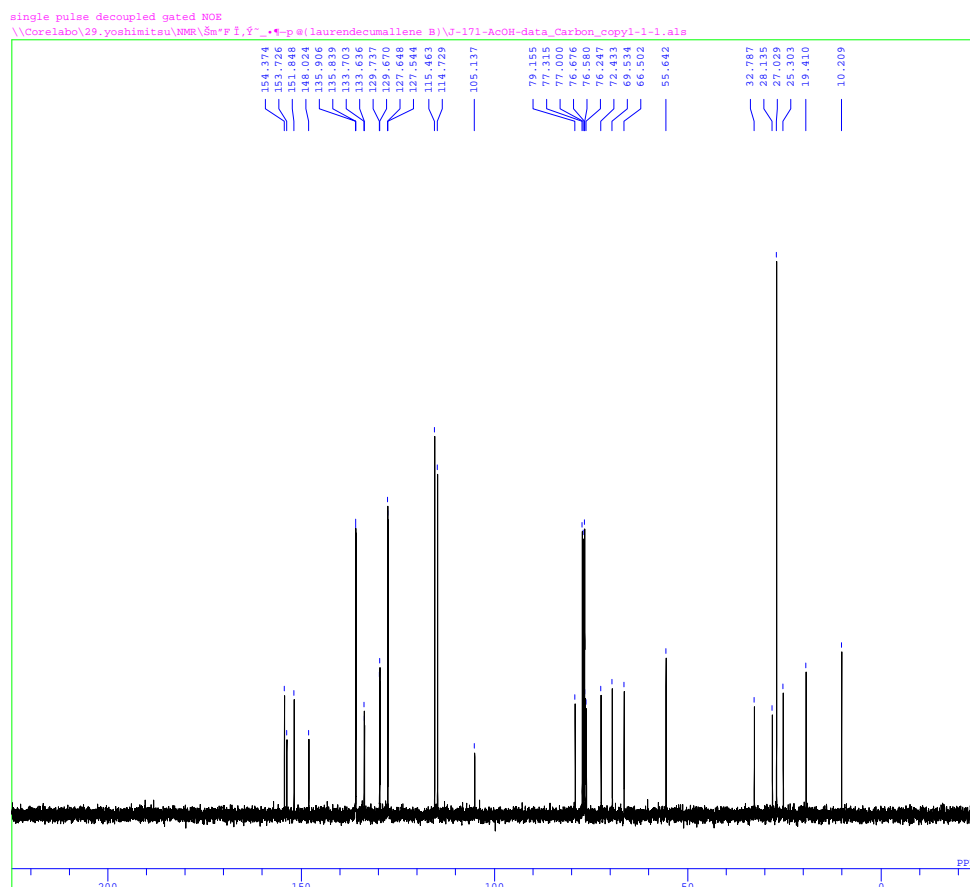

DFILE J-171-AcOH-data\_Carbon-  
COMNT single pulse decoupled  
DATIM 2012-10-16 11:11:53  
OBNUC 13C  
EXMOD carbon.jxp  
OBFRQ 100.53 MHz  
OBSET 5.35 KHz  
OBFIN 5.86 Hz  
POINT 26214  
FREQU 25125.63 Hz  
SCANS 35  
ACQTM 0.0000 sec  
PD 2.0000 sec  
PWL 3.00 usec  
IRNUC 1H  
CTEMP 24.3 c  
SLVNT CDCL3  
EXREF 77.00 ppm  
BF 1.20 Hz  
RGAIN 60

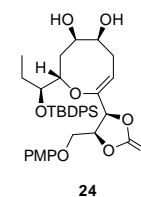

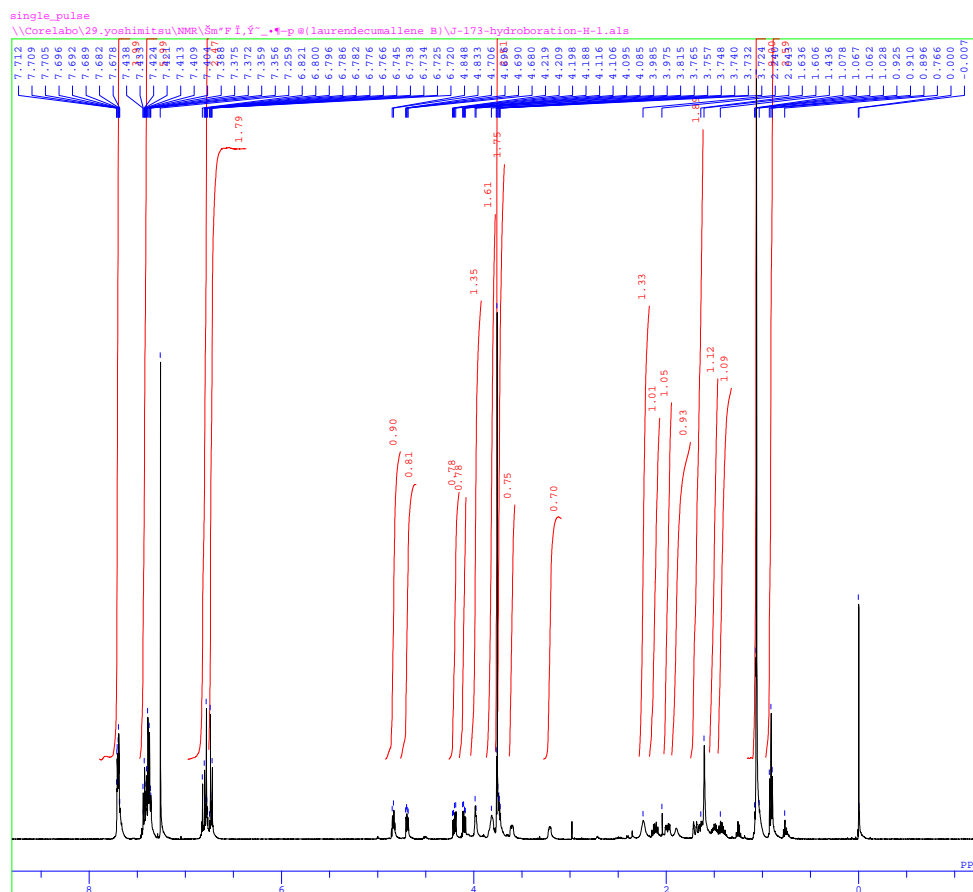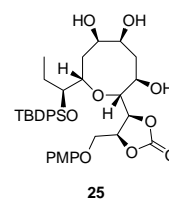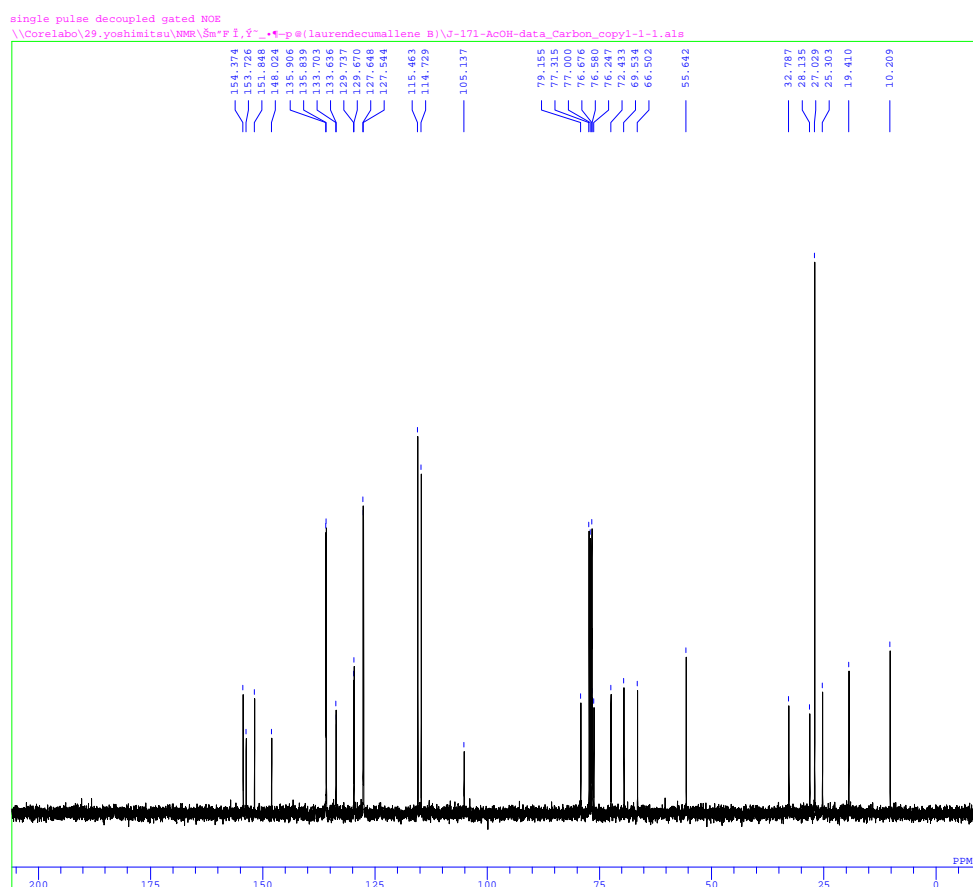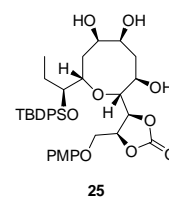

Difference NOE Experiment  
\\Corelabo\29.yoshimitsu\NMR\5m<sup>3</sup>F 2, 5<sup>3</sup>...-p@(\laurendecumallene B)\NOE-hydroboration.als

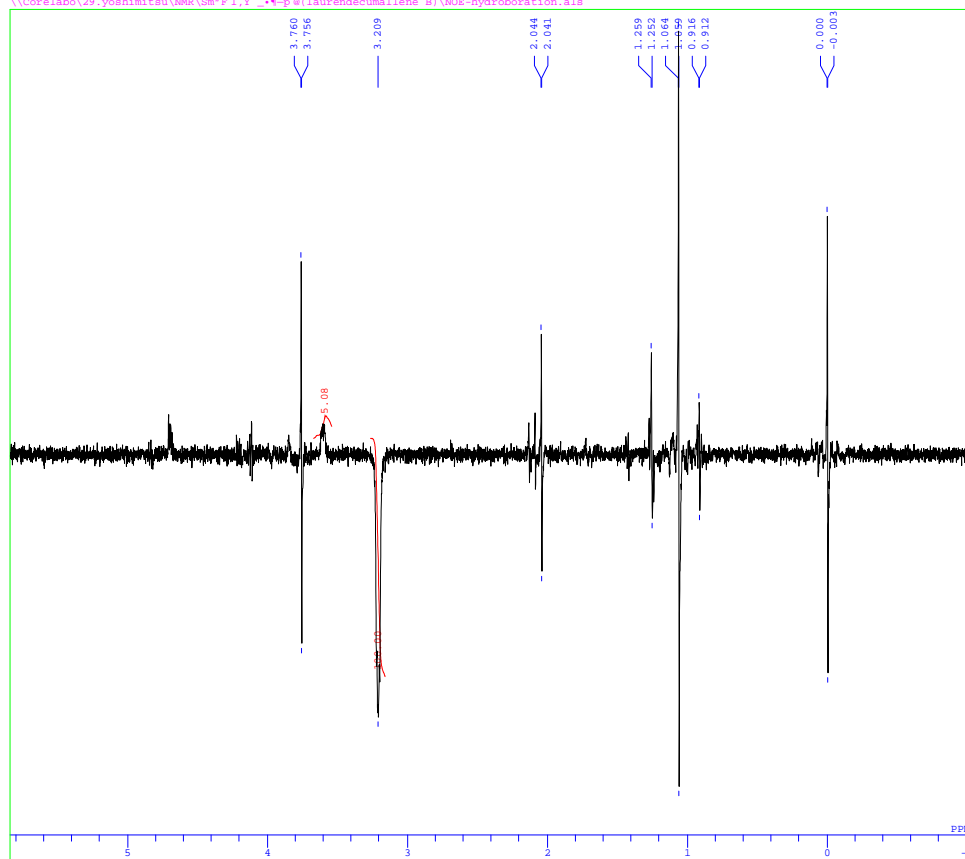

```

DPFLE NOE-hydroboration.als
COMET difference NOE Experiment
DATIM 2012-10-11 21:33:58
ONUC 1H
EXMOD difference_noe_1
OBFREQ 500.16 MHz
OSSET 2.41 KHz
OBFIN 6.01 Hz
POINT 16364
FREQU 9384.38 Hz
SCANS 16
ACQTM 1.7459 sec
PD 7.0000 sec
PW1 13.00 usec
IRNUC 1H
CTEMP 26.1 c
SILVET
EXREF CDCL3
BF 0.00 ppm
BF 0.12 Hz
RGAIN 50

```

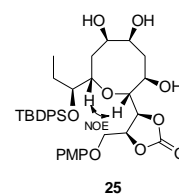

single\_pulse  
\\Corelabo\29.yoshimitsu\NMR\5m\*F i, 2'-.\*-p@lauredecumallene B)\acetonide-3-H-1.als

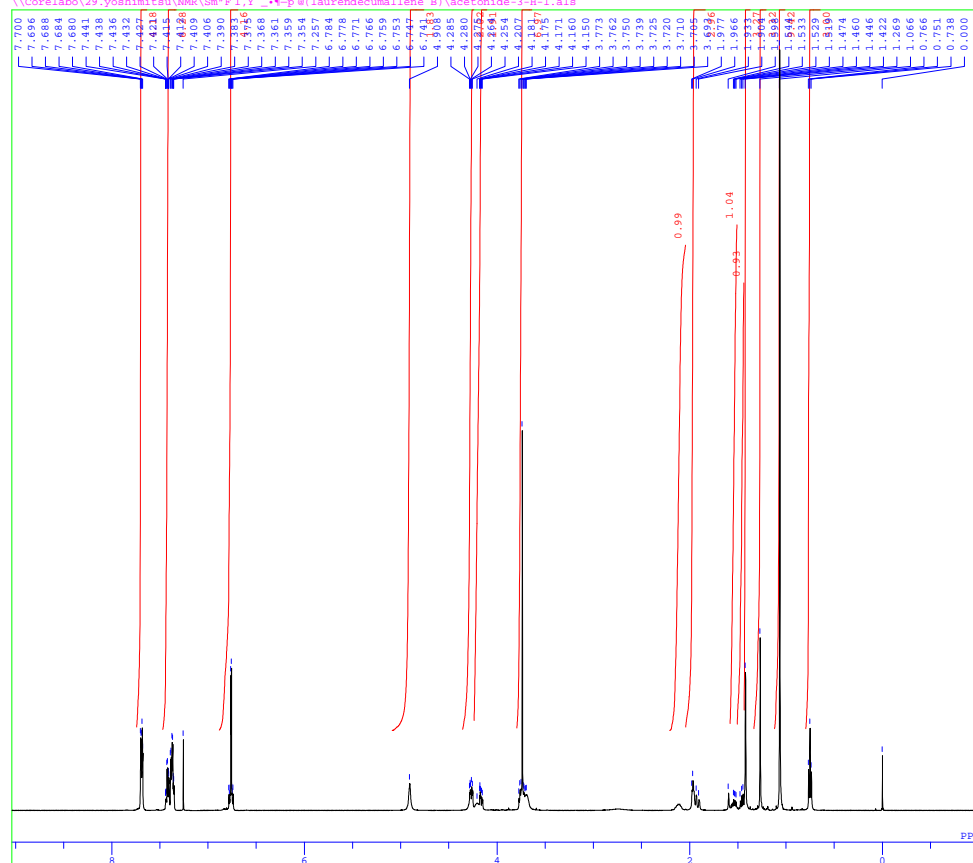

DFILE acetonide-3-H-1.als  
COMNT single\_pulse  
DATIM 2013-03-11 16:07:56  
OBNUC 1H  
EXMOD single\_pulse.ex2  
OBFRQ 500.16 MHz  
OBSET 2.41 KHz  
OBFIN 6.01 Hz  
POINT 13107  
FREQU 7507.39 Hz  
SCANS 8  
AQTM 1.7459 sec  
PD 5.0000 sec  
PWL 6.50 usec  
IRNUC 1H  
CTEMP 25.0 c  
SLVNT CDCL3  
EXREF 0.00 ppm  
BF 0.12 Hz  
RGAIN 38

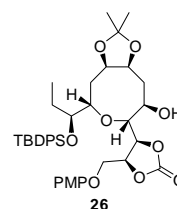

single pulse decoupled gated NMR  
\\Corelabo\29.yoshimitsu\NMR\5m\*F i, 2'-.\*-p@lauredecumallene B)\acetonide-3-Carbon-1-1.als

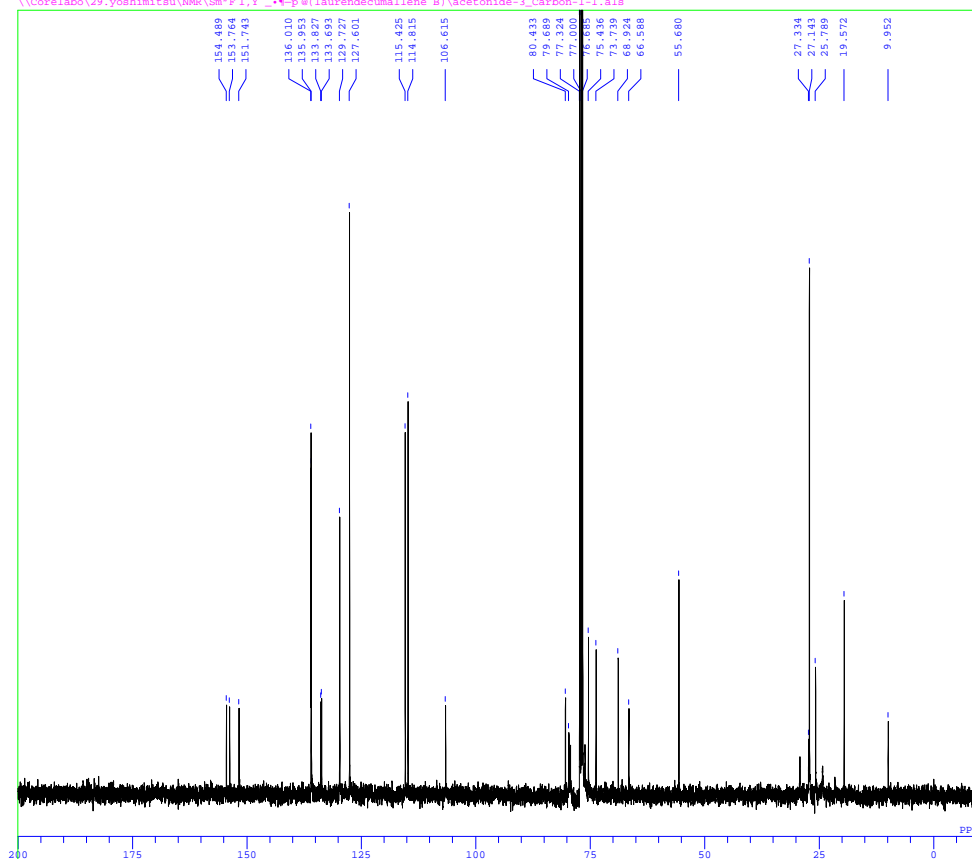

DFILE acetonide-3-Carbon-1-1  
COMNT single pulse decoupled  
DATIM 2013-03-11 16:39:37  
OBNUC 13C  
EXMOD carbon.jxp  
OBFRQ 100.53 MHz  
OBSET 5.35 KHz  
OBFIN 5.86 Hz  
POINT 26214  
FREQU 25125.63 Hz  
SCANS 500  
AQTM 1.0433 sec  
PD 2.0000 sec  
PWL 3.00 usec  
IRNUC 1H  
CTEMP 24.8 c  
SLVNT CDCL3  
EXREF 77.00 ppm  
BF 1.20 Hz  
RGAIN 60

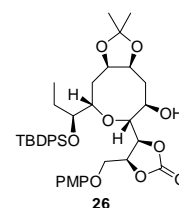

single\_pulse  
 \\Corelabo\29.yoshimitsu\NMR\5m\*Ff.8~.4-p@lauredecumallene B\THF-formation-H-2.als

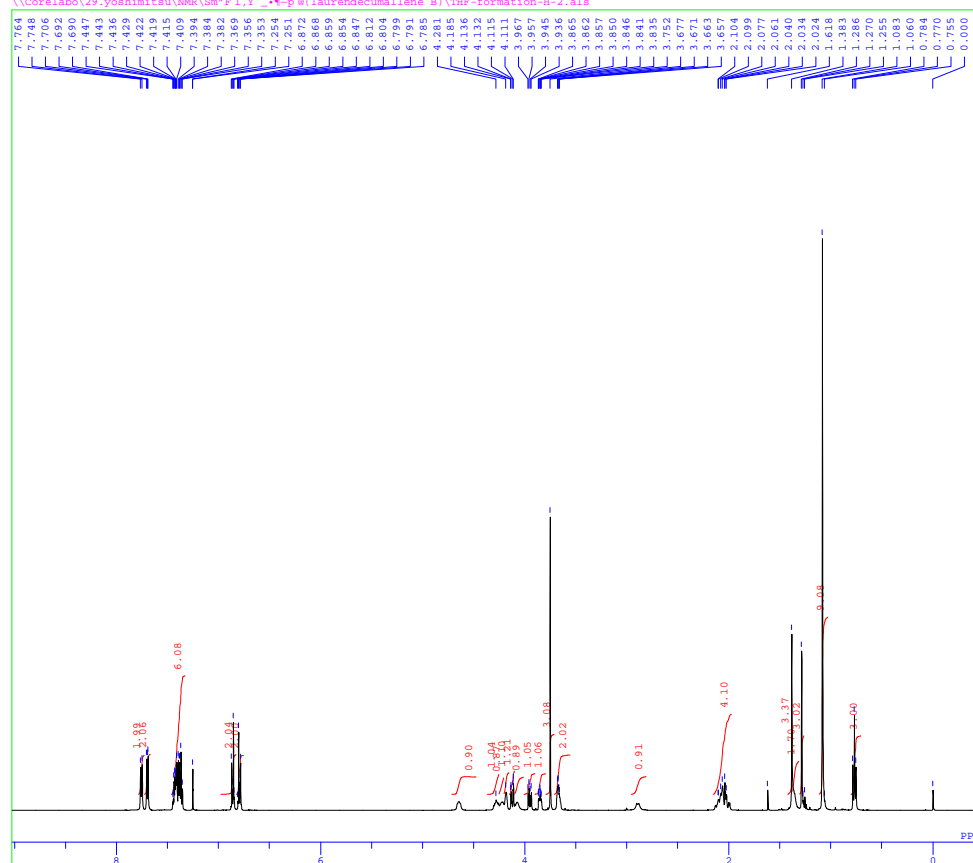

DFILE THF-formation-H-2.als  
 COMNT single\_pulse  
 DATIM 2013-03-12 11:40:15  
 OBNUC 1H  
 EXMOD single\_pulse.ex2  
 OBFREQ 500.16 MHz  
 OBSST 2.41 KHz  
 OBFIN 6.01 Hz  
 POINT 13107  
 FREQU 7507.39 Hz  
 SCANS 8  
 ACQTM 1.7459 sec  
 PD 5.0000 sec  
 PW1 6.50 usec  
 IRNUC 1H  
 CTEMP 25.4 c  
 SLVNT CDCL3  
 EXREF 0.00 ppm  
 BF 0.12 Hz  
 RGAIN 34

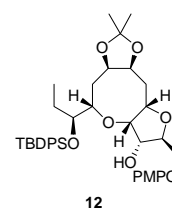

single\_pulse decoupled gated NOE  
 \\Corelabo\29.yoshimitsu\NMR\5m\*Ff.8~.4-p@lauredecumallene B\THF-formation-C-1.als

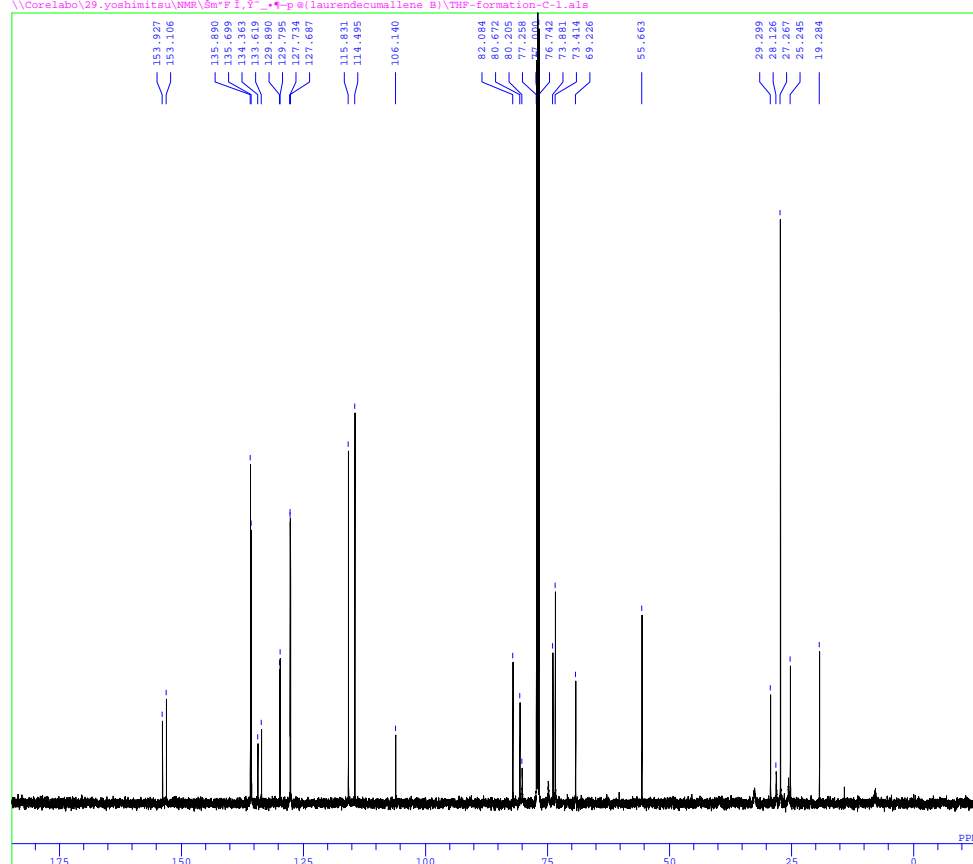

DFILE THF-formation-C-1.als  
 COMNT single\_pulse decoupled  
 DATIM 2013-03-12 12:07:46  
 OBNUC 13C  
 EXMOD single\_pulse\_dec  
 OBFREQ 125.77 MHz  
 OBSST 7.87 KHz  
 OBFIN 4.21 Hz  
 POINT 26214  
 FREQU 31446.06 Hz  
 SCANS 570  
 ACQTM 0.8336 sec  
 PD 2.0000 sec  
 PW1 3.73 usec  
 IRNUC 13C  
 CTEMP 26.2 c  
 SLVNT CDCL3  
 EXREF 77.00 ppm  
 BF 1.20 Hz  
 RGAIN 54

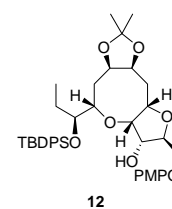

[illegible]

\\Corelabo\29\_yoshimitsu\NMR\5M\F1.Y\2014-09-10-10-00-00\p@laurendecumaliene B\aiter-barton-C-13.ms

136.014  
135.937  
129.604  
129.470  
129.477  
127.429

82.847  
77.563  
77.288  
77.000  
76.722  
75.862

25.738  
25.038  
25.627

Chemical structure of compound 10, a bicyclic acetal. It features a central eight-membered ring fused to a five-membered ring. The eight-membered ring has a tert-butyldiphenylsilyloxy (TBDPSO) group and a hydroxyl group. The five-membered ring has a tert-butyldiphenylsilyloxy group and a hydroxyl group.

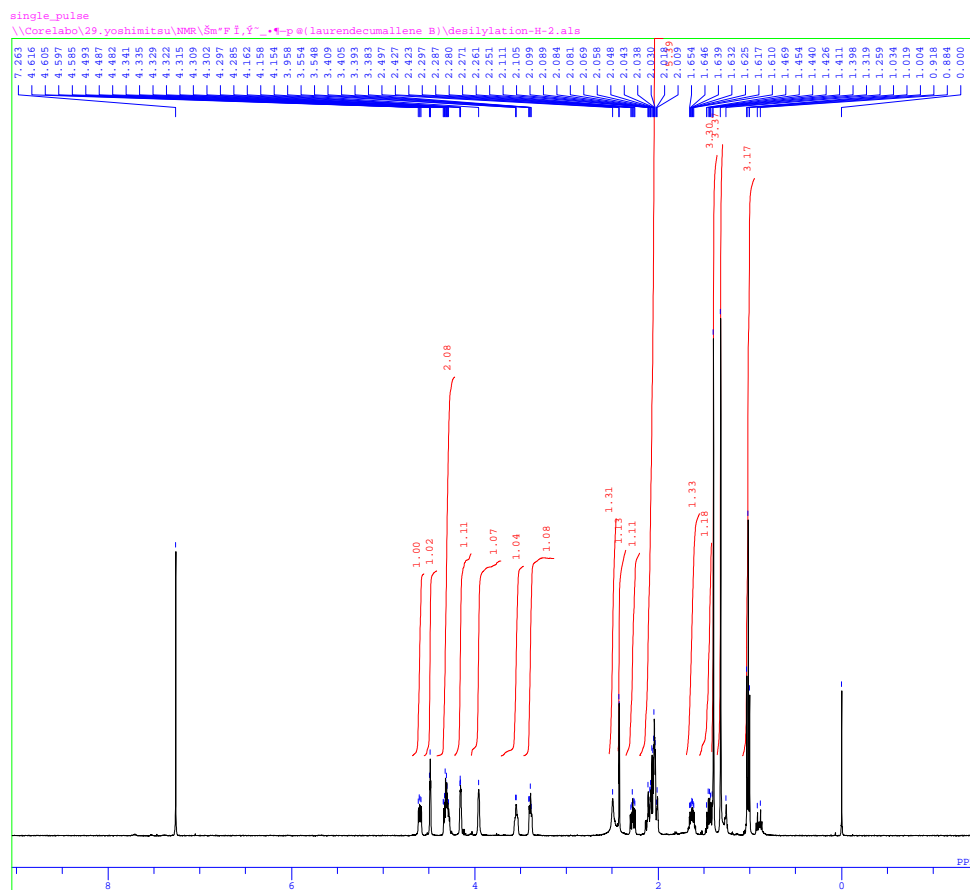

DFILE desilylation-H-2.als  
COMNT single\_pulse  
DATIM 2013-03-16 10:37:25  
OBNUC 1H  
EXMOD single\_pulse.ex2  
OBFRQ 500.16 MHz  
OBSET 2.41 KHz  
OBFIN 6.01 Hz  
POINT 13107  
FREQU 7507.39 Hz  
SCANS 8  
AQTM 1.7459 sec  
PD 5.0000 sec  
FW1 6.50 usec  
IRNUC 1H  
CTEMP 25.8 c  
SLVNT CDCL3  
EXREF 0.00 ppm  
BF 0.12 Hz  
RGAIN 46

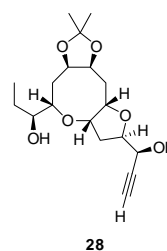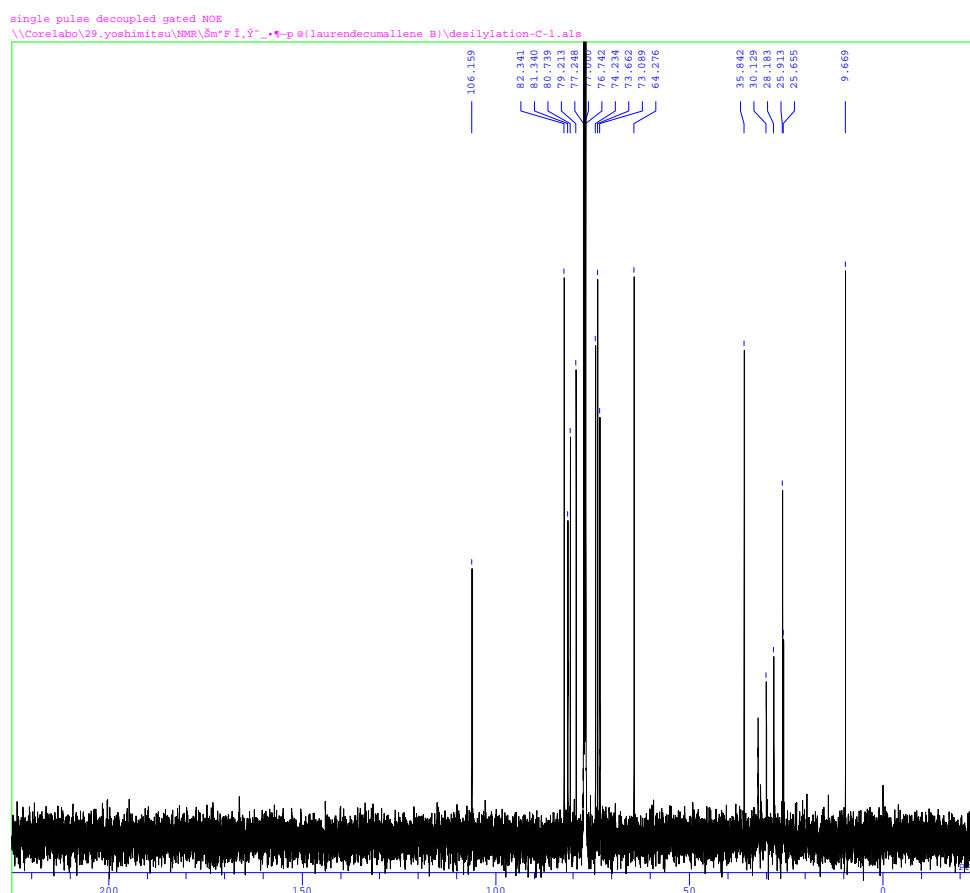

DFILE desilylation-C-1.als  
COMNT single\_pulse decoupled  
DATIM 2013-03-16 11:53:42  
OBNUC 13C  
EXMOD single\_pulse\_dec  
OBFRQ 125.77 MHz  
OBSET 7.87 KHz  
OBFIN 4.21 Hz  
POINT 26214  
FREQU 31446.06 Hz  
SCANS 1601  
AQTM 0.8336 sec  
PD 2.0000 sec  
FW1 3.73 usec  
IRNUC 1H  
CTEMP 25.5 c  
SLVNT CDCL3  
EXREF 77.00 ppm  
BF 1.20 Hz  
RGAIN 52

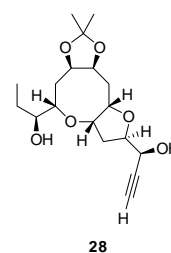

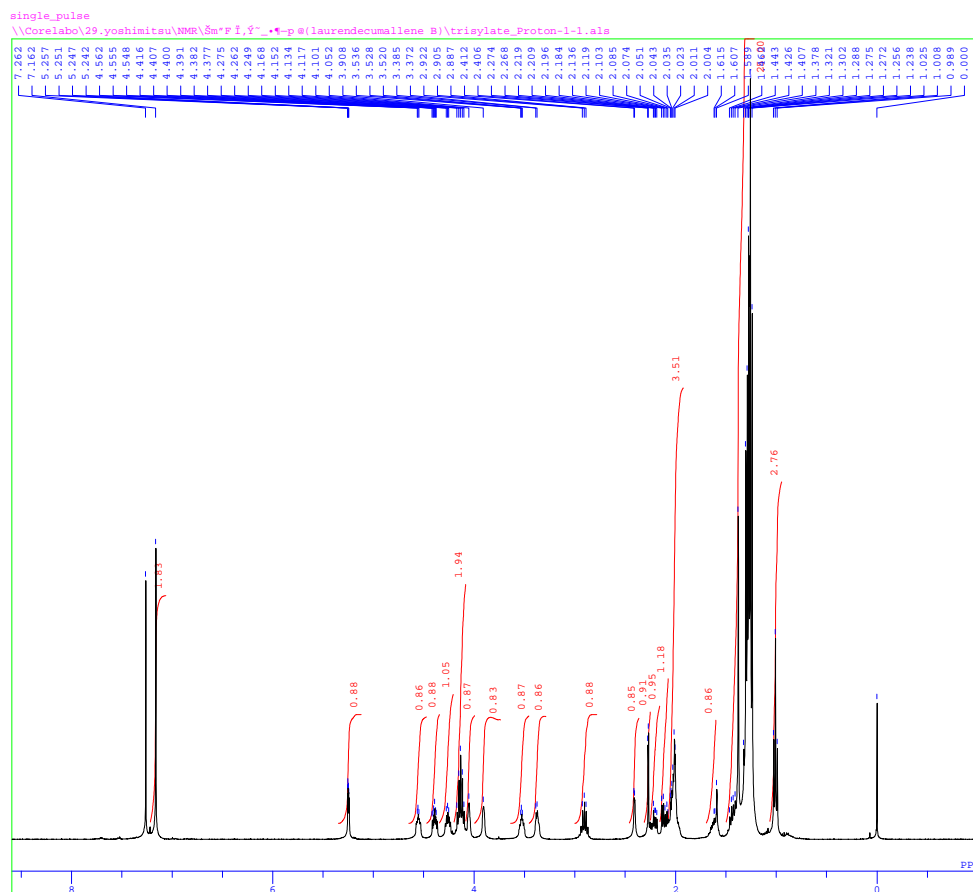

DFILE trisyate\_Proton-1-1.a  
COMNT single\_pulse  
DATIM 2013-03-16 19:45:46  
OBNUC 1H  
EXMOD proton.jxp  
OBFRQ 399.78 MHz  
OBSET 4.19 KHz  
OBFIN 7.29 Hz  
POINT 13107  
FREQU 7598.78 Hz  
SCANS 8  
AQTM 1.7249 sec  
PD 5.0000 sec  
PW1 4.65 usec  
IRNUC 1H  
CTEMP 25.0 c  
SLVNT CDCL3  
EXREF 0.00 ppm  
BF 0.12 Hz  
RGAIN 38

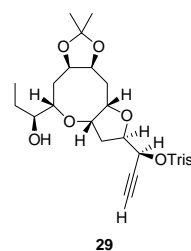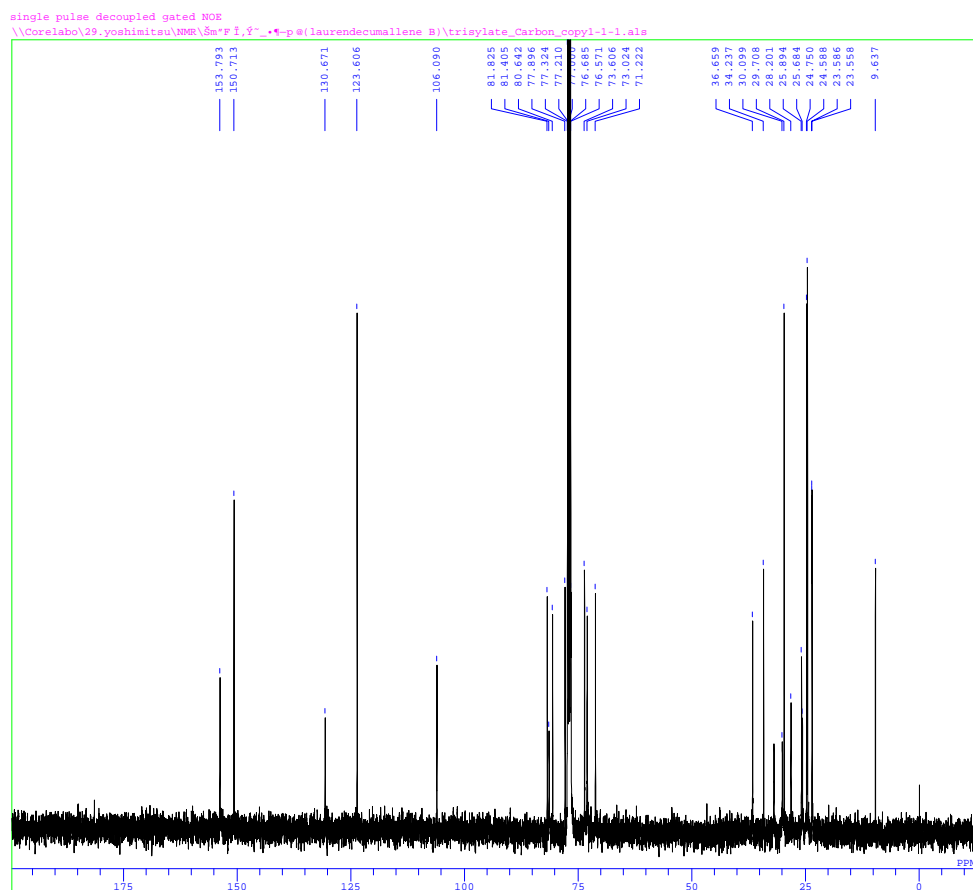

DFILE trisyate\_Carbon\_copy1-  
COMNT single pulse decoupled  
DATIM 2013-03-16 19:47:28  
OBNUC 13C  
EXMOD carbon.jxp  
OBFRQ 100.53 MHz  
OBSET 5.35 KHz  
OBFIN 5.86 Hz  
POINT 26214  
FREQU 25125.63 Hz  
SCANS 1010  
AQTM 0.0000 sec  
PD 2.0000 sec  
PW1 3.00 usec  
IRNUC 1H  
CTEMP 25.0 c  
SLVNT CDCL3  
EXREF 77.00 ppm  
BF 1.20 Hz  
RGAIN 60

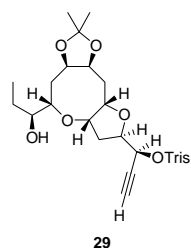



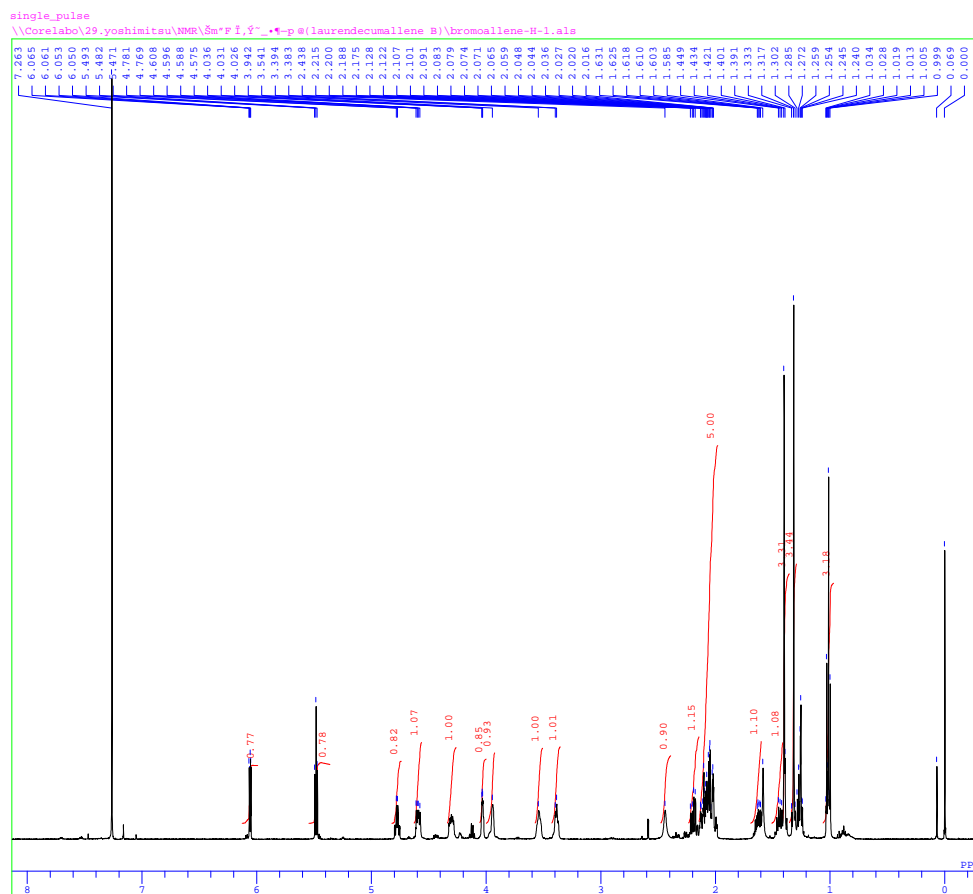

DFILE bromoallene-H-1.als  
COMNT single\_pulse  
DATIM 2013-03-18 16:11:02  
OBNUC 1H  
EXMOD single\_pulse.ex2  
OBFRQ 500.16 MHz  
OBSET 2.41 KHz  
OBFIN 6.01 Hz  
POINT 13107  
FREQU 7507.39 Hz  
SCANS 8  
AQTM 1.7459 sec  
PD 5.0000 sec  
PW1 6.50 usec  
IRNUC 1H  
CTEMP 25.6 c  
SLVNT CDCL3  
EXREF 0.00 ppm  
BF 0.12 Hz  
RGAIN 46

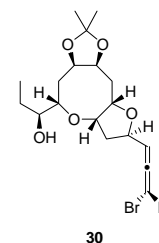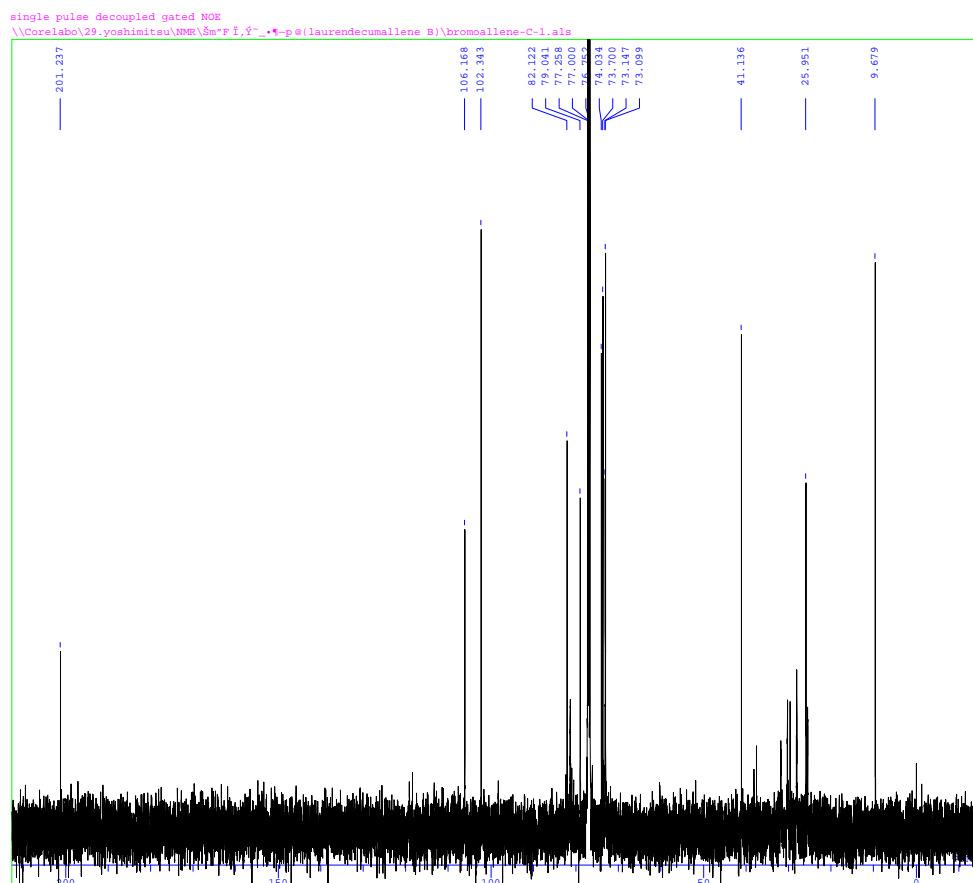

DFILE bromoallene-C-1.als  
COMNT single pulse decoupled  
DATIM 2013-03-18 17:08:18  
OBNUC 13C  
EXMOD single\_pulse\_dec  
OBFRQ 125.77 MHz  
OBSET 7.87 KHz  
OBFIN 4.21 Hz  
POINT 26214  
FREQU 31446.06 Hz  
SCANS 1200  
AQTM 0.8336 sec  
PD 2.0000 sec  
PW1 3.73 usec  
IRNUC 1H  
CTEMP 26.2 c  
SLVNT CDCL3  
EXREF 77.00 ppm  
BF 1.20 Hz  
RGAIN 52

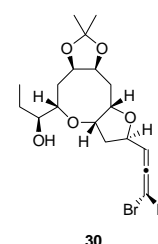

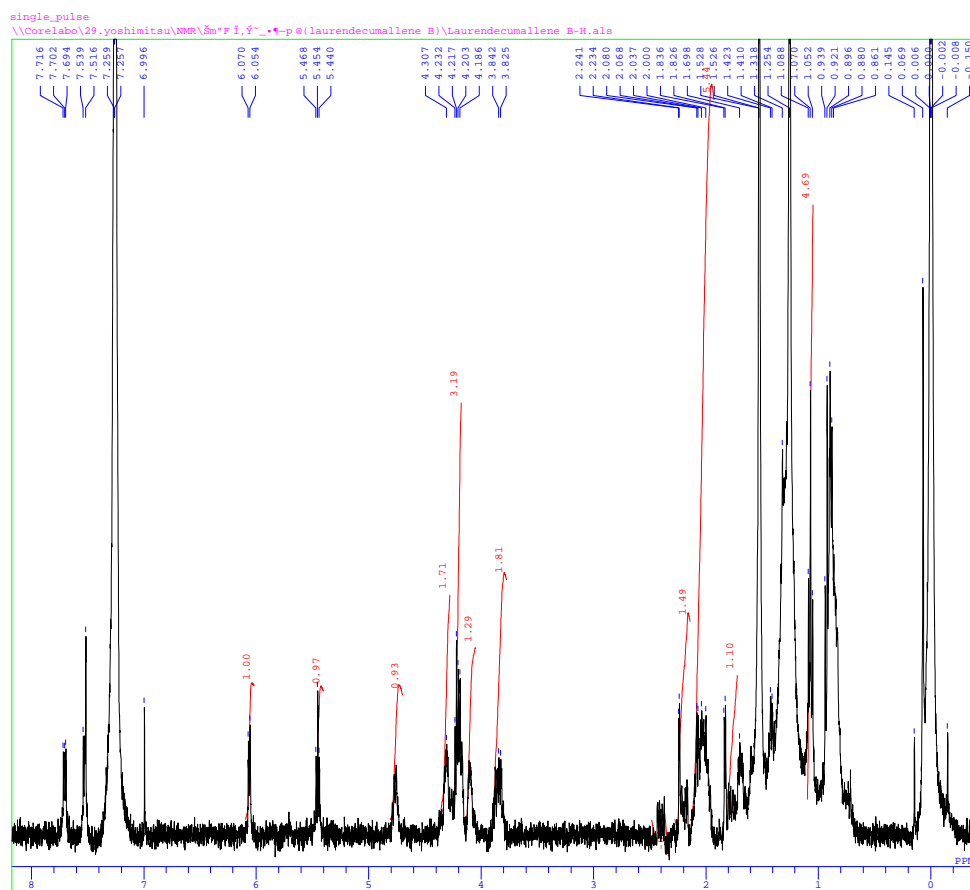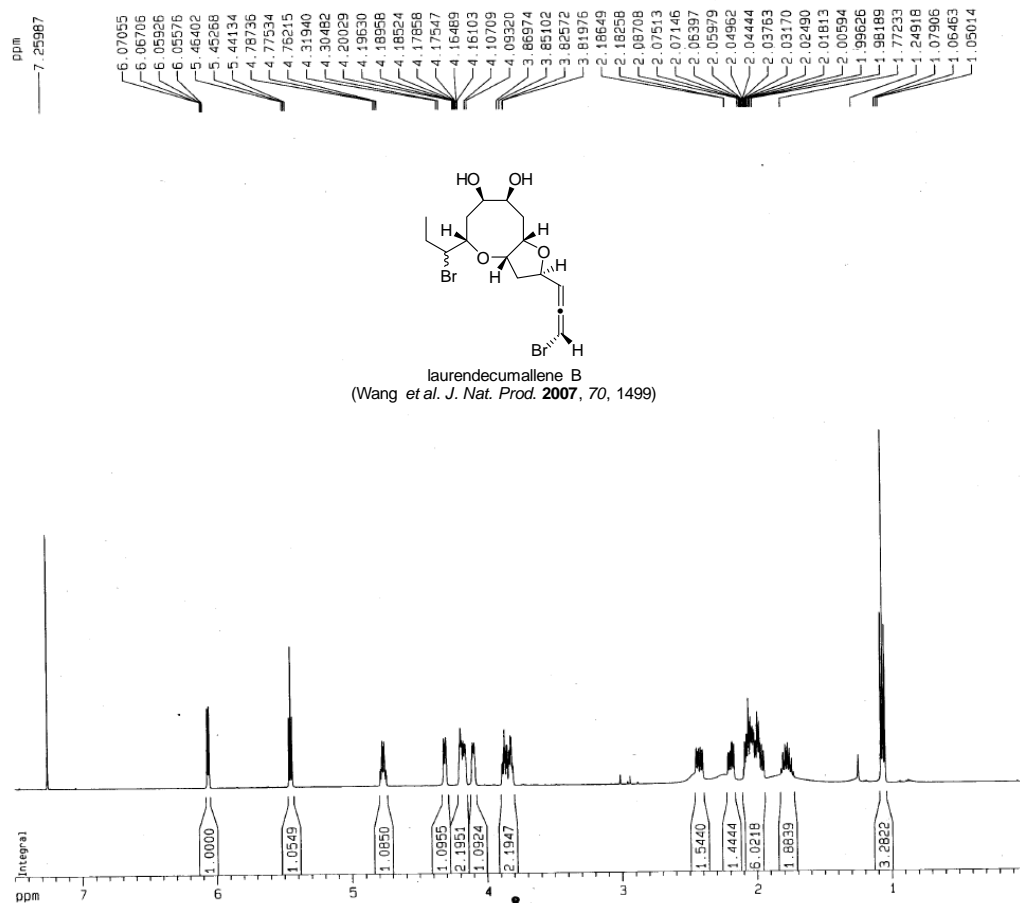

Supplement: Supplementary file 1 [file 4043137]
